1 **Rural Roads to Cognitive Resilience (RRR): A prospective cohort study protocol**

2 **Short title:** Rural Roads to Cognitive Resilience Cohort Protocol

3 Lilah M. Besser<sup>a\*</sup>, Lisa Wiese<sup>b</sup>, Diane J. Cook<sup>c</sup>, Janet Holt<sup>b</sup>, Sheryl Magzamen<sup>d</sup>, Bryan Minor<sup>c</sup>,

4 Diana Mitsova<sup>e</sup>, Juyoung Park<sup>f</sup>, Olivia Sablan<sup>g</sup>, Madeleine Tourelle<sup>a</sup>, Christine Williams<sup>b</sup>

5

6 <sup>a</sup> Comprehensive Center for Brain Health, Department of Neurology, University of Miami Miller

7 School of Medicine, 7700 Camino Real Suite 200, Boca Raton, FL 33433, United States of

8 America

9 <sup>b</sup> C.E. Lynn College of Nursing, Florida Atlantic University, 777 Glades Road, Boca Raton, FL

10 33431, United States of America

11 <sup>c</sup> School of Electrical Engineering and Computer Science, Washington State University, Box

12 642752, Pullman, WA 99164, United States of America

13 <sup>d</sup> Department of Environmental and Radiological Health Sciences, Colorado State University,

14 1681 Campus Delivery, Fort Collins, CO 80523, United States of America

15 <sup>e</sup> Department of Urban and Regional Planning, Florida Atlantic University, 777 Glades Road,

16 Boca Raton, FL 33431, United States of America

17 <sup>f</sup> College of Nursing, University of Arizona, 1305 N Martin Avenue, Tucson, AZ, 85721

18 <sup>g</sup> Department of Atmospheric Science, Colorado State University, Campus Delivery, Fort

19 Collins, CO 80523, United States of America

20

21 **\* Corresponding Author:** [lmb9767@miami.edu](mailto:lmb9767@miami.edu) (LB)

22

23 **ABSTRACT**

24 **Background:** Ambient air pollution, detrimental built and social environments, social isolation  
25 (SI), low socioeconomic status (SES), and rural (versus urban) residence have been associated  
26 with cognitive decline and risk of Alzheimer’s disease and related dementias (ADRD). Research  
27 is needed to investigate the influence of ambient air pollution and built and social environments  
28 on SI and cognitive decline among rural, disadvantaged, ethnic minority communities. To  
29 address this gap, this cohort study will recruit an ethn racially diverse, rural Florida sample in  
30 geographic proximity to seasonal agricultural burning. We will (1) examine contributions of  
31 smoke-related fine particulate matter (PM<sub>2.5</sub>) exposures to SI and cognitive function; (2)  
32 determine effects of built and social environments on SI and cognitive function; and (3)  
33 contextualize SI and cognitive function among residents from different ethnoracial groups during  
34 burn and non-burn seasons.

35 **Methods:** We will recruit 1,087 community-dwelling, dementia-free, ≥45-year-olds from five  
36 communities in Florida’s Lake Okeechobee region. Over 36 months, participants will complete  
37 baseline visits to collect demographics, health history, and health measurements (e.g., blood  
38 pressure, body mass index) and 6-month follow-ups assessing cognitive function and social  
39 isolation at each visit. A subsample of 120 participants representative of each community will  
40 wear smartwatches to collect sensor data (e.g., heart rate) and daily routine and predefined  
41 activities (e.g., GPS-captured travel, frequent destinations) over two months. Ecological  
42 momentary assessments (EMA) (e.g., whether smoke has bothered participant in last 30  
43 minutes) will occur over two months during agricultural burning and non-burning months.  
44 PurpleAir monitors (36 total) will be installed in each community to continuously monitor  
45 outdoor PM<sub>2.5</sub> levels.

46 **Ethics and expected impact:** This study received Florida Atlantic University’s Institutional  
47 Review Board approval and will require participant informed consent. We expect to identify  
48 individual- and community-level factors that increase the risk for SI and cognitive decline in a  
49 vulnerable rural population.

50

51

52

53

54

55

56

57

58

59

60

61

## 62 INTRODUCTION

63 Alzheimer’s disease and related dementias (ADRD) comprise multiple neurodegenerative  
64 diseases with differing neuropathological origins, including Alzheimer’s disease, Lewy body  
65 disease, and frontotemporal degeneration [1-3]. Over time, the neuropathological burden of these  
66 diseases leads to dementia, which is the “loss of memory, language, problem-solving and other  
67 thinking abilities that are severe enough to interfere with daily life” [4]. ADRD risk increases  
68 with age and is 1.5 to 2 times higher among Black and Hispanic individuals, who are more likely  
69 to have lower educational attainment and chronic conditions (e.g., diabetes, hypertension,  
70 cardiovascular disease) that are known risk factors for ADRD [5, 6]. Social determinants of  
71 health (SDOH), which are the conditions where people live, work, worship, play, and age, have  
72 been increasingly implicated in increasing ADRD risk, particularly for minoritized and  
73 socioeconomically disadvantaged communities [7-9]. For instance, Black and Hispanic older  
74 adults tend to live in neighborhoods with greater area deprivation and lower greenspace access,  
75 and these factors have been associated with greater risk of cognitive decline and dementia in  
76 numerous studies [10-14].

77  
78 In addition, both air pollution and social isolation are key SDOH that have been named by the  
79 Lancet Commission as ADRD risk factors [6, 15], and exposures to ambient air pollution and  
80 social isolation are more prevalent in historically disadvantaged communities [16, 17]. Ambient  
81 air pollution, including particulate matter of  $<2.5\mu\text{m}$  in size ( $\text{PM}_{2.5}$ ), has been shown to increase  
82 morbidity and mortality and ADRD risk, particularly among urban-dwelling Hispanic and Black  
83 individuals [18-23]. The preponderance of air quality health effects studies in the U.S. have been  
84 conducted using U.S. Environmental Protection (EPA) Agency Air Quality System data and

85 have focused largely in urban areas where monitors are located. Agricultural burns, like wildfire  
86 smoke, have smoke plumes with large spatiotemporal gradients which frequently impact sparsely  
87 populated areas with limited extant monitoring. Yet, agricultural fires, unlike wildfires, have  
88 constrained size, intensity, and smoke production, thereby testing the limits of detection by  
89 satellite. A major advantage of studying agricultural burns is that in contrast to wildfires,  
90 agricultural fires follow a predictable schedule in circumscribed spatial areas, enabling ground  
91 monitoring. However, studies on the health effects from rural agricultural fires which  
92 disproportionately impact Black and Hispanic communities are limited [23].

93  
94 Social isolation, recognized as a significant threat to public health by the U.S. Surgeon General, is  
95 characterized by the lack of social engagement, supportive social networks, and/or participation  
96 in social activities [24]. Numerous studies have linked social isolation to poorer cognitive  
97 function and ADRD risk [25-31]. For example, 70-year olds from the Lothian Birth Cohort who  
98 lived alone had slower processing speed and those who reported greater loneliness had worse  
99 overall cognitive function [27].

100  
101 While sufficient evidence is available to implicate social isolation in increasing ADRD risk, the  
102 published studies are primarily limited to urban and White populations, with little known about  
103 how these factors impact rural and ethnoracially diverse populations that are most vulnerable to  
104 developing ADRD.

105  
106 Neighborhood social and built environments are SDOH that have also been associated with  
107 cognitive function and ADRD risk [8, 10, 11, 32, 33]. For instance, neighborhood social

108 environments, such as living in areas with greater area deprivation, greater psychosocial disorder  
109 (e.g., crime), and ethnoracial segregation, have been associated with worse ADRD-related  
110 outcomes in prior studies [13, 34, 35]. Built environments are manmade physical environments  
111 including but not limited to transportation and pedestrian networks, social and walking  
112 destinations (shops, libraries, banks, restaurants), parks and other greenspaces, and health care  
113 facility access. A systematic review of studies on various built environment factors found the  
114 strongest evidence to date was for associations between greater walking/social destinations and  
115 more greenspace in the neighborhood and better cognitive function and lower dementia risk [32].  
116 However, similar to the studies focused on either social isolation or air pollution exposure and  
117 ADRD risk, few studies of neighborhood environments and ADRD have centered on rural,  
118 ethnoracially diverse older adults.

119  
120 Rural residence (versus urban) has been associated with higher incidence or prevalence of  
121 ADRD [36, 37]. Some reasons for this may be lower educational attainment and lower access to  
122 health care and other resources that help maintain brain health into later life [38-40] However,  
123 the relationship between rural/urban residence and ADRD risk is not straightforward given the  
124 differences in access to care and diagnostic services in rural areas that may lead to  
125 underdiagnosis of ADRD, in addition to the significant differences in the ethnoracial groups  
126 living in rural areas depending on U.S. region [41]. Overall, few studies have been conducted on  
127 risk factors for ADRD among ethnoracially diverse rural populations in the U.S.

128  
129 Altogether, the extant literature suggests that several SDOH at the environmental (i.e., air  
130 pollution, neighborhood social and built environments, rural residence) and individual level (i.e.,

131 ethnoracial group and social isolation) increase ADRD risk. However, no known studies have  
132 investigated how all these factors considered together contribute to cognitive decline in older  
133 adults, particularly those living in rural areas with varying seasonal levels of PM<sub>2.5</sub> due to  
134 agricultural burning. To address this significant scientific gap, the Rural Roads to cognitive  
135 Resilience (RRR) cohort study will recruit a sample of ethnoracially diverse (predominantly  
136 Black and Hispanic), socioeconomically disadvantaged older adults living in a rural agricultural  
137 area surrounding Lake Okeechobee in South Central Florida. The study, which targets a region  
138 beset by a combination of the aforementioned and other unique ADRD risks, aims to (1) examine  
139 the contribution of agricultural smoke-related PM<sub>2.5</sub> exposures to social isolation and cognitive  
140 function, (2) determine the effects of the built (e.g., park space) and social environment (e.g.,  
141 neighborhood disadvantage) on social isolation and cognitive function, and (3) contextualize  
142 social isolation and cognitive function among residents from different ethnoracial groups using  
143 ecological momentary assessment (EMA) and smartwatch sensor-derived behavior models with  
144 a subsample of 120 stratified by Lake O communities during agricultural burn and non-burn  
145 seasons.

146

## 147 **MATERIALS AND METHODS**

### 148 **Setting and design**

149 *Study summary.* Rural Roads to cognitive Resilience (RRR) is a longitudinal, observational  
150 cohort study that will broadly collect data on ambient air pollution exposure, neighborhood built  
151 and social environments, social isolation, and cognitive functioning among participants 45 and  
152 older living in rural communities surrounding Lake Okeechobee, Florida. The study is comprised  
153 of two data collection efforts: (i) a 36-month study of ~1,000 individuals to investigate social

154 isolation and cognitive function may be affected by ambient PM<sub>2.5</sub> and neighborhood built/social  
155 environments, and (ii) a smartwatch study subsample of ~120 participants recruited from the 36-  
156 month study.

157  
158 *Setting.* The Everglades Agricultural Area in South Central Florida is the largest sugarcane-  
159 producing region in the U.S. from ~October to May each year, sugar companies employ  
160 farmworkers to prepare 400,000 acres of fields for harvesting by burning the sugarcane outer  
161 leaves. The population surrounding Lake Okeechobee (Lake O) demonstrates a multitude of  
162 disparities that are risk factors for ADRD. For example, in the town of Belle Glade, 40% of the  
163 population did not graduate from high school, health literacy is equivalent to 7th grade, 91% are  
164 minoritized ethnic groups, the area has limited healthcare access, and poverty affects 41% of the  
165 population [42]. In addition, during burns, residents surrounding Lake Okeechobee describe  
166 experiences of stench, eye irritation, feeling tight in the chest, and outdoor areas covered in soot,  
167 preventing outdoor social engagement [43]. Typically, the background PM<sub>2.5</sub> levels in the Lake O  
168 region are relatively low, but increases of up to 2µg/m<sup>3</sup> occur during agricultural burning season  
169 [44]. Altogether, Lake O provides a fitting setting to study the impact of air pollution on diverse,  
170 rural, and high-risk communities.

171  
172 *Specific aims*

173 Aim 1. Examine the contribution of particulate matter <2.5µm (PM<sub>2.5</sub>) exposures to social  
174 isolation and cognitive function (CF), through multilevel growth modeling.



- 175       • *Aim 1a.* Examine baseline levels and growth trajectories of SI and CF associated  
176       with changes in PM<sub>2.5</sub> during agricultural burn and non-burn seasons over a 36-  
177       month period, accounting for individual- and neighborhood- level characteristics.
- 178       • *Aim 1b.* Examine the effect modification of race/ethnicity on the relationship of PM<sub>2.5</sub> on  
179       baseline levels and growth trajectories of SI and CF, accounting for individual- and  
180       neighborhood-level characteristics.
- 181
- 182   Aim 2. Determine the effects of the built environment (e.g., retail destinations, park  
183   space) and social environment (e.g., crime, SES) on SI and CF through linear mixed  
184   modeling.
- 185       • *Aim 2a.* Examine SI and CF associated with the built and social environment over  
186       a 36-month period (baseline, and FY 1,2,3), controlling for individual- and other  
187       neighborhood-level characteristics.
- 188       • *Aim 2b.* Explore the effect modification of race/ethnicity on the relationship of the built  
189       and social environment with SI and CF, in view of their educational and social  
190       disadvantage.
- 191
- 192   Aim 3. Contextualize SI and CF among residents from different ethnoracial groups using EMA  
193   and sensor- derived behavior models during burn and non-burn seasons in a subsample of 120  
194   ethnoracially diverse participants, stratified by Lake O communities.
- 195       • *Aim 3a.* Examine residents' momentary changes in behavioral markers, mood, and  
196       cognitive performance, associated with changes in air quality and the social and  
197       built environment.

- 198
- *Aim 3b.* Characterize differences among ethnoracial groups and between women and men
- 199 in their momentary changes in behavioral markers, mood, and CF performance in
- 200 response to changes in air quality and the social and built environment.

201

202 *Enrollment.* RRR will recruit a sample of approximately 1,000 individuals located in Hendry,

203 Glades, Okeechobee, and Palm Beach counties. More specifically, participants will be enrolled

204 from 4 rural communities (i.e., Clewiston, Pahokee/Canal Point, Okeechobee, Belle Glade/South

205 Bay) and 1 suburban/urban community (i.e., Royal Palm Beach). The communities were chosen

206 to provide diversity in ethnoracial and socioeconomic groups and socioeconomic status (higher

207 Area Deprivation Index score: more deprived neighborhood) and sufficient variation in social

208 and built environments at the census block group level to successfully complete the study aims

209 (Figures 1-4).

210

211 <**Figure 1.** Florida communities included in the study. \* Exact locations/census block groups

212 included will depend on recruitment.>

213 <**Figure 2.** Variation in neighborhood percentage of Hispanic residents by community. \* Exact

214 locations/census block groups included will depend on recruitment.>

215 <**Figure 3.** Variation in neighborhood percentage of Black/African American residents by

216 community. \* Exact locations/census block groups included will depend on recruitment.>

217 <**Figure 4.** Variation in Area deprivation index (neighborhood socioeconomic status) by

218 community. \* Exact locations/census block groups included will depend on recruitment.>

219

220

221 *Screening and inclusion and exclusion criteria.* Eligible participants will be:

- 222 • Community-dwelling individuals from the Lake Okeechobee region in Florida,
- 223 • Age 45 years and older,
- 224 • English, Spanish, or Creole speakers,
- 225 • Able to participate in study activities,
- 226 • Staying in the area for at least 12 months, and,
- 227 • Not leaving for an extended period during the summer months.

228

229 In addition to these criteria, the street address and years lived at that location will be determined.

230 Potential participants will also be asked their date of birth (from which age is auto-calculated),

231 their primary language, and years of education. As a means of subjective cognitive functional

232 assessment, everyone who participates in the pre-screening will also be asked “Do you feel that

233 your memory is getting worse?” In addition, the inclusion form will collect the town and site

234 where the data collection will occur. Potential participants will then be pre-screened for dementia

235 and excluded if MoCA-5 minute (Mini MoCA) scores are <12 (clinically important risk of

236 cognitive impairment) [45]. This brief task takes ≤5 minutes and assesses the domains of

237 attention, executive function/language, orientation, and memory. If they are unable to obtain the

238 minimum score of 12 (adjusted for years of education), they will be referred to their provider (if

239 unavailable, a local provider who has agreed to follow up with an assessment) and provided with

240 a small appreciation gift for their time (writing pen) and a flyer regarding resources on brain

241 health.

242

243 *Recruitment strategy.* Within each of the communities, the study team will conduct recruitment  
244 events at partnering churches and community and senior centers, with the goal of recruiting  
245 individuals representing the ethnoracial diversity of the chosen communities. Participants will be  
246 recruited by community research assistants (CRA) who have personal knowledge of these  
247 communities, including their places of worship, neighborhood community centers, and parent-  
248 teacher associations (several current CRAs are local educators, in addition to social workers,  
249 pastoral leaders, and other trusted gatekeepers).

250  
251 Adjustments to the recruitment strategy will be made carefully and in response to opportunities  
252 that would be consistent with the study aims or due to unexpected recruitment issues. The study  
253 will be advertised via flyers and word of mouth. Enrollment will be guided by ADRD Research  
254 Recruitment principles: (1) fostering existing community partnerships, (2) building on trust to  
255 share ownership of the research mission, and (3) welcoming new partnerships based on  
256 community needs. The study embraces the principle of increasing workforce diversity and  
257 community bridges between university and community settings by hiring residents as CRAs.  
258 During participant recruitment activities, we will offer clinical measurements [e.g. HbA1C (6-  
259 month blood glucose) and body mass index (BMI)] in partnership with Healthier Glades and the  
260 local Diabetes Coalition.

261  
262 *Informed consent.* If a potential participant is eligible and willing, they continue with the consent  
263 procedures using the e-consent form in REDCap. All participants receive a written copy of the  
264 consent form in their preferred language (English, Spanish, or Haitian Creole). The consent  
265 process consists of a conversation in which a bilingual member of the research team reviews the

266 consent form, answers questions, and confirms their willingness to participate by reading the  
267 consent statement aloud. Additionally, they will be asked if they would be willing to participate  
268 in future studies. The CRA will confirm the participant's response and indicate in REDCap that  
269 informed consent was obtained. If the enrollee affirms additional interest in participating in  
270 either the smartwatch or air pollution monitor subsample, this will also be indicated in REDCap  
271 for potential future follow-up. When subsample participants are consented, they will be asked to  
272 consent using a separate consent process with a subsample consent form which is also  
273 documented in REDCap.

274  
275 *Participant incentives.* All participants will receive one \$25 gift card for completing the initial  
276 research activities (enrollment and baseline data collection). Those who return for annual and  
277 follow-up visits will receive a \$25 gift card after each visit. A purposive sample of 120 persons  
278 distributed throughout the five communities will be offered a \$25 gift card for each month of  
279 smartwatch monitoring (2 months total). Thirty-six participants who agree to host low-cost PM<sub>2.5</sub>  
280 sensors (i.e., PurpleAir monitors) monitors will receive a one-time additional gift card worth  
281 \$20.

282  
283 *Timeline of study assessments.* For the 36-month study, at the baseline visit (T0), which occurs  
284 immediately after consent, individuals will provide data on sociodemographics, health history,  
285 and health behaviors. Participants will return to complete six-month follow-up visits for a total of  
286 seven visits (baseline and six follow-ups). During each follow-up visit (T1-T6), individuals will  
287 complete the cognitive and mini-physical performance assessments, biomarkers (e.g., blood  
288 pressure, BMI), and PROMIS measures targeting perceptions of social isolation, alcohol use,

289 anxiety, depression, sleep problems, physical function, fatigue, ability to participate socially, and  
290 degree of pain interference with activities of daily living. The first participant was enrolled on  
291 January 20, 2024.

292  
293 For the smartwatch sub-study, participants will wear an Apple Watch SE for 2 four-week  
294 periods, one during burn season and one during a non-burn period. Social isolation and cognitive  
295 function will be assessed during both the burn and non-burn seasons to identify potential changes  
296 in response to smoke-related air pollution (PM<sub>2.5</sub>). These outcomes are critical for understanding  
297 the health impacts of air pollution on cognitive and social well-being. Built and social  
298 environments (e.g., park spaces and ethnoracial composition) will be characterized at baseline  
299 and repeated if more current addresses or data become available during the study. Air quality  
300 monitoring will be continuous throughout the 36-month period. Table 1 shows the schedule of  
301 assessments and instrument collection by visit.

302

303 **Table 1. Data collection schedule for 36-month study**

|                                                             | T0 <sup>d</sup> | T1    | T2     | T3     | T4     | T5     | T6     |
|-------------------------------------------------------------|-----------------|-------|--------|--------|--------|--------|--------|
| Data collected                                              |                 | 6 mo. | 12 mo. | 18 mo. | 24 mo. | 30 mo. | 36 mo. |
| ADRD assessment (MoCA v.8.1-8.3 and Cognigram) <sup>a</sup> |                 | X     | X      | X      | X      | X      | X      |
| Sociodemographics <sup>b</sup>                              | X               | X     | X      | X      | X      | X      | X      |
| Health conditions/behaviors <sup>b</sup>                    | X               | X     | X      | X      | X      | X      | X      |
| Blood pressure, height, weight <sup>a</sup>                 |                 | X     | X      | X      | X      | X      | X      |
| Mini Physical Performance Test (mini PPT) <sup>a</sup>      |                 | X     |        | X      |        | X      |        |
| Psychosocial measures (e.g., isolation) <sup>b</sup>        |                 | X     | X      | X      | X      | X      | X      |
| Anxiety, depression <sup>b</sup>                            |                 | X     | X      | X      | X      | X      | X      |
| Sleep problems <sup>b</sup>                                 |                 | X     | X      | X      | X      | X      | X      |
| Physical function, fatigue, pain interference <sup>b</sup>  |                 | X     | X      | X      | X      | X      | X      |
| Ability to participate socially                             |                 | X     | X      | X      | X      | X      | X      |
| Alcohol use <sup>b</sup>                                    |                 | X     |        | X      |        | X      |        |
| Air pollution monitors <sup>c</sup>                         | X               | X     | X      | X      | X      | X      | X      |

FU = Follow-up; mo=month; <sup>a</sup> From clinic assessment; <sup>b</sup> From questionnaire; <sup>c</sup> Monitors distributed at key sites within communities; <sup>d</sup> Screening visit

304

305 **Study measures at baseline visit (T0)**

306 *Sociodemographics and health survey.* Participants will be asked for their contact information,

307 years living in their community, and basic demographics (e.g., gender, race/ethnicity,

308 educational attainment, country of birth, preferred language, marital status, and religion). The

309 survey will also ask about their household and housing/rental characteristics (e.g., living

310 situation, number in household, home ownership/renting status, housing type, receipt of rental

311 assistance or social security disability), their economic status (e.g., household income,

312 employment/retirement information including whether in sugar cane fields), and primary

313 transportation mode. Participants will be asked about their digital literacy and technology use

314 and access (WiFi, computer, smartwatch/wearable fitness tracker). They will be asked about

315 their health and insurance use/access and pre-existing health behaviors and conditions (i.e.,

316 smoking, asthma, chronic obstructive pulmonary disease, chronic cough, high blood pressure,  
317 heart disease, diabetes, stroke, sleep problems, head injury, hearing or vision loss, physical  
318 limitations). Lastly, participants will be asked about their physical activity frequency including  
319 how much is completed outdoors, and whether they feel safe walking in the dark in their  
320 neighborhood.

321

### 322 **Study measures at follow-up visits (T1-T6)**

323 *Sociodemographics and health survey.* At the T1-T6 visits, the shortened survey will re-ask  
324 about contact information, marital status, living situation, household characteristics,  
325 employment/retirement status and details, digital literacy, technology access and use, main  
326 transportation mode and car ownership, health care and insurance use/access, smoking status,  
327 physical activity frequency, physical limitations, and history of chronic conditions. Participants  
328 will also be asked about any change in educational attainment.

329 *Cognitive measures.* At the T1 to T6 visits, participants will report whether they experienced  
330 worsening of their memory. Cognitive testing will include the Montreal Cognitive Assessment  
331 (MoCA) [46], a global cognition screening instrument with scores ranging from 0 to 30 with  
332 lower scores indicating greater impairment. A score of 26 or above is generally considered  
333 normal, while lower scores may indicate cognitive impairment. In addition, the Cognigram will  
334 assess four cognitive domains [psychomotor function, attention, learning, and working memory)  
335 [47, 48]. A score of < 90 on learning/working memory composite and  $\geq 90$  on  
336 attention/psychomotor composite indicates risk of mild cognitive impairment (MCI).

337



338 *Physical exam measures.* At the T1 to T6 visits, systolic and diastolic blood pressure and height  
339 and weight will be measured. Blood pressure will be measured by oscillometer, and high systolic  
340 blood pressure (SBP) will be defined as values  $\geq 140$  mmHg. Measured height and weight will be  
341 used to calculate BMI ( $\text{kg}/\text{m}^2$ ), with BMI values of  $>30\text{kg}/\text{m}^2$  indicative of obesity.

342  
343 *Modified CAIDE (mCAIDE).* At the T1, T3, and T5 visits, the mCAIDE will be calculated based  
344 on age ( $<65$ ,  $65-72$ , and  $>72$  years), education ( $<12$ ,  $12-16$ , and  $>16$  years), sex assigned at birth  
345 (male, female), high SBP ( $\geq 140$  mmHg), obesity ( $>30\text{kg}/\text{m}^2$ ), hypercholesterolemia (yes, no), and  
346 low physical function measured via the Mini Physical Performance Test (mini PPT) (high, low).  
347 Participants will be asked if they have been told they have high total cholesterol indicating  
348 hypercholesterolemia (i.e., “Has your doctor or health professional ever told you that you have  
349 high cholesterol?”). Participants will complete the mini PPT, which requires four basic activities  
350 of daily living (i.e., picking up item from floor, 50-foot walk, sit to stand (chair rise), and  
351 progressive Romberg (balance) tasks). Mini PPT values  $\geq 12$  (out of 16) indicates functional  
352 physical status. The mCAIDE is a validated measure that ranges from 0 to 14 with higher scores  
353 indicative of higher risk of cognitive impairment.

354  
355 *Alcohol consumption.* At the T1, T3, and T5 visits, participants will be asked about their alcohol  
356 use using the AUDIT-C (alcohol consumption), a brief, reliable, and valid screening tool for  
357 alcohol use consisting of three questions [49]. The first question “How often do you have a  
358 drink containing alcohol?” is answered on a Likert Scale from never to  $\geq 4$  times a week. If  
359 participants answer “never”, the screening ends and they receive a total score of 0. Otherwise,  
360 two additional questions will be asked about the amount of alcohol consumed: “How many on a

361 typical day when drinking” (1 to 10 or more), and “How often do you have five or more drinks  
362 on one occasion?” answered “Never” to “Daily or almost Daily”. A score of 3 or more or  
363 reporting 6 or more drinks in a single occasion indicates risk for alcohol use disorder.

364

365 *Psychosocial measures.* At the T1 to T6 visits, the PROMIS Social Isolation 4a [50], Lubben  
366 Social Network Scale-6 (LSNS-6) [51], Berkman-Syme Social Network Index (BSNI) [52], and  
367 De Jong Gierveld Loneliness Scale will assess social isolation, social connectedness, and social  
368 networking, and loneliness, respectively [53].

- 369 • PROMIS Social Isolation 4a: A brief tool with evidence of validity and reliability  
370 (Coefficient alpha > 0.90) assessing social isolation over the past seven days with four  
371 items (e.g., feel left out) rated from 1 (Never) to 5 (Always). The total score ranges from  
372 4 to 20, with higher scores indicating greater social isolation.
- 373 • LSNS-6: An instrument with evidence of validity and reliability (Coefficient alpha >  
374 0.80) assessing social engagement through six items (e.g., number of relatives see/hear  
375 from at least once a month) scored from 0 to 5. The total score ranges from 0 to 30, with  
376 lower scores indicating greater social engagement.
- 377 • BSNI: An instrument with evidence of validity and reliability (Coefficient alpha = 0.79),  
378 assessing social connectedness through 11 items (e.g., frequency attending religious  
379 meetings/services) measuring four types of social connections, including marital  
380 status (married versus not), sociability (number and frequency of contacts with children,  
381 close relatives, and close friends), church group membership (yes versus no), and  
382 membership in other community organizations (yes versus no). Scores range from 0 to 4,  
383 with higher scores indicating greater connectedness.

384 • De Jong Gierveld Loneliness Scale: An instrument with evidence of validity and  
385 reliability (Coefficient alpha  $\geq 0.70$ - $0.76$ ) instrument that collects 6 items (e.g., miss  
386 having people around) that measure overall loneliness, including emotional and social  
387 loneliness, with responses ranging from "yes" to "more or less" to "no." The total score  
388 ranges from 0 to 6, with higher scores indicating greater loneliness.

389

390 *Anxiety and depression.* At the T1-T6 visits, the PROMIS Depression-Short Form 4a [54]  
391 (Coefficient alpha  $> 0.90$ ) will be used to assess depressive symptoms, with four questions (e.g.,  
392 sadness and hopelessness over the past week) rated on a 5-point Likert scale ranging from 1  
393 (Never) to 5 (Always). The total score ranges from 4 to 20, with higher scores indicating greater  
394 depressive symptoms. Also, at the T1-T6 visits, the valid and reliable (Cronbach's  $\alpha > 0.90$ )  
395 PROMIS Anxiety-Short Form 4a [54] will be used to assess anxiety symptoms over the past  
396 seven days. Four items (i.e., feeling uneasy) are rated from 1 (Never) to 5 (Always), with the  
397 total score ranging from 4 to 20.

398

399 *Sleep related problems.* Two instruments will be administered at visits T1 to T6 to capture sleep  
400 related problems. The PROMIS SF-Sleep Disturbance 4a [55] collects 4 items (e.g., difficulty  
401 falling asleep) on a 5-point scale (very poor to very good), with a total raw score ranging from 8  
402 to 40. The Sleep Related Impairment 4a collects 4 items on a 5-point scale (not at all to very  
403 much), with a total raw score also ranging from 8 to 40. The raw scores for both of these are  
404 rescaled into a standardized T-score with a mean of 50 and a standard deviation of 10. Higher  
405 scores indicate a greater severity of sleep disturbance.

406

407 *Physical function, fatigue, and pain interference* will be captured at visits T1 to T6. The  
408 PROMISE SF-Physical Function 4a [56] collects 4 items (e.g., ability to do chores) on a 5-point  
409 scale (without any difficulty to unable to do), with a total score ranging from 4 to 16. The  
410 PROMISE SF-Fatigue 4a [57] collects 4 items (e.g., trouble starting things because tired) on a 5-  
411 point scale (not at all to very much), with a total score ranging from 8 to 40. The PROMISE SF-  
412 Pain Interference 4a [58] collects 4 items (e.g., how much pain interfered with chores) on a 5-  
413 point scale (not at all to very much), with a total score ranging from 6 to 30.

414

415 *Difficulty participating socially.* At visits T1 to T6, the 4-item PROMISE SF-Ability to  
416 Participate Social 4a [59] will be used to assess difficulty participating in social activity. The  
417 questions (e.g., trouble doing activities with friends) are answered on a 5-point scale (never to  
418 always) with a total raw score ranging from 4 to 20.

419

#### 420 **Air pollution data**

421 We will measure PM<sub>2.5</sub> using two U.S. Environmental Protection Agency monitors, one located  
422 in one agricultural study community just south of Lake Okeechobee and one located in the  
423 reference community east of the main study region (Figure 1). Due to the dynamic nature (i.e.,  
424 stochastic) of smoke plumes and air pollution dispersion from agricultural fires, we will also  
425 install 36 low-cost PurpleAir sensors placed in the study area by the CSU team and the  
426 community research assistants. We will ensure the air sensors are installed at residences located  
427 in majority Black/Hispanic and majority non-Hispanic White neighborhoods, according to  
428 Census data. PurpleAir monitors provide estimates of PM<sub>2.5</sub> by mass using the Plantower  
429 PMS5003 laser particle counter, which does not have the accuracy of the EPA AQS monitors.

430 To approximate the EPA monitoring data, we (1) apply the Plantower  $PM_{2.5}$  correction factors  
431 from Barkjohn *et al.* (2021) and (2) temporally bias-correct Plantower  $PM_{2.5}$  measurements  
432 using closely located PurpleAir and EPA monitors. PurpleAir monitors are also equipped with  
433 a BOSHC BME280 to measure environmental factors (i.e., temperature, pressure, relative  
434 humidity).

435  
436 All PurpleAir data from study-specific monitors are available for download through the  
437 PurpleAir Data Download Tool. Though there are not extensive publicly operating PurpleAir  
438 monitors in the study area, there are several PurpleAir monitors that operate east of the study  
439 area closer to the Atlantic coast, which in prior study campaigns (Sablan *et al.* 2024) have been  
440 used to compare to data collected as part of our study. As of 2023, PurpleAir charges for data  
441 download for publicly operating monitors using a point-based billing system. Points range in  
442 value (100,000 to 1,000,000 per USD) depending on how many are purchased. The cost of data  
443 on a point basis depends on the data fields and number of observations requested. Based on  
444 prior work, the research team will leverage recently developed high-resolution fire-detection  
445 and Aerosol Optical Depth (AOD) products from NASA's Moderate Resolution Imaging  
446 Radiospectrometer (MODIS), NOAA's Visible Infrared Imaging Radiometer Suite (VIIRS),  
447 and the Geostationary Operational Environmental Satellite (GOES-16) to develop local  
448 climatologies of fire and smoke. This procedure leverages NOAA's Hazard Mapping System  
449 (HMS) satellite-based observations to separate smoke from non-smoke influence. We will  
450 create daily kriged surfaces of bias-corrected  $PM_{2.5}$  for each study community for baseline and  
451 subsequent study years. Participants will be assigned exposures based on their home location.  
452 Based on daily estimates of  $PM_{2.5}$ , we can aggregate the observations at any temporal

453 resolution, including hour, day, week, month, and burn and non-burn seasons, to form the  
454 exposure assessment strategy for Aim 1.

455

#### 456 **Neighborhood social and built environment variables**

457 Neighborhood social and built environments at the residential Census block group level will be  
458 captured with 4 domain indices (green environment, neighborhood socio-economic status, social  
459 environment, walk-friendly design) and a summary Healthy Neighborhood Index (HNI). Domain  
460 categories were determined *a priori* as they are major neighborhood-level constructs associated  
461 with ADRD risk factors and disease risk in prior studies (citations). These measures will be  
462 calculated for the baseline visit year and following years, accounting for changes in residential  
463 address and changes in neighborhood environments, as applicable. ArcGIS Pro will be used to  
464 calculate and map these objective geographic information systems (GIS) measures.

465

#### 466 *Green environment*

- 467 • Percentage of tree canopy: Tree canopy data obtained from the U.S. Forestry Service will  
468 be used to calculate the percentage of the block group comprised of tree canopy (i.e.,  
469 percentage of tree coverage of the ground provided by tree leaves, branches, needles, and  
470 stems).
- 471 • Mean normalized difference vegetation index (NDVI) will be calculated for each  
472 participant's neighborhood for the burn and non-burn periods based on satellite imagery  
473 available from the U.S. Geological Survey (USGS, Landsat 8 Level 2, Collection 2, Tier  
474 1).<sup>84</sup> The NDVI scale is -1 to +1 (more positive measures=healthier vegetation/"greener")  
475 and is calculated as follows:  $NDVI = (R_{NIR} - R_{RED}) / (R_{NIR} + R_{RED})$ .  $R_{NIR}$  is reflectance in near-

476 infrared (0.86-0.88mm) and  $R_{RED}$  is reflectance in red (0.64-0.67mm). Reflectance values  
477 are captured in 30x30 meter Landsat satellite images. Mean NDVI will be calculated for  
478 participants' Census block group. This global measure of the density of healthy vegetation  
479 captures all types of greenery including purposefully-built greenspaces (e.g., park/open  
480 spaces, street plantings, and yards) and those in natural and rural environments (e.g.,  
481 forests, farms, and uninhabited areas), and has been linked to multiple ADRD risk factors  
482 and outcomes. <sup>65,85-87</sup>

483 • Percentage open space: National Land Cover Dataset (NLCD) will be acquired through  
484 the Multi-Resolution Land Characteristics Consortium, to calculate the percentage of  
485 open space in the block group. The NLCD uses 30-meter spatial resolution satellite  
486 imagery to characterize land and surface uses and types, such as developed land, barren  
487 land, deciduous forest, scrub, and wetlands. Developed open space includes mostly  
488 vegetation/grasses (<20% impervious surfaces) found in parks, large family lots, planted  
489 vegetation for recreation or erosion control, and golf courses.

490 • Percentage park space, distance to nearest park, and number of parks: We will calculate  
491 the percentage of the block group comprised of park space using combined data from the  
492 Florida Geographic Data Library's Areas of Interest layer for Florida Parks and  
493 Recreational Facilities and ESRI's ArcGIS Online data layer "USA Parks" (covers state  
494 parks). Distance in miles from the residence to the nearest park and number of parks in  
495 the block group will be calculated based on the same park data sources.

496

497

498

499 *Neighborhood socioeconomic status*

- 500       • Area deprivation index (ADI): ADI values will be downloaded from the University of  
501       Wisconsin Neighborhood Atlas. ADI was calculated from 17 U.S. Census block group  
502       variables on socioeconomic status (e.g., median home values, % families below poverty  
503       level), representing income, education, employment, and housing quality. Higher scores  
504       (range: 1-100) equate to more socioeconomically deprived neighborhoods.
- 505       • Percentage of vacant homes, households without internet, and average monthly housing  
506       costs: Data will be obtained from the U.S. Census American Community Survey (ACS)  
507       to calculate the percentage of all housing units in the block group that are vacant and  
508       without internet, as well as the average monthly housing costs (calculated using the  
509       average of both median mortgage and median gross rent) per block group.
- 510       • Percentage of renter-occupied/for-rent homes and housing and transportation costs as a  
511       percentage of household income: Data will be obtained from the Center for  
512       Neighborhood Technology Housing and Transportation Index to calculate the percentage  
513       of all housing units that a rented/for-rent as well as the average housing plus  
514       transportation costs (as percentage of household income) in the block group.

515

516    *Neighborhood social environment*

- 517       • Crime rate: Rates of violent crimes by city and county will be downloaded from the  
518       Federal Bureau of Investigation. Violent crime includes homicide, rape, robbery,  
519       aggravated assault, property crimes, arson, burglary, larceny-theft, and motor vehicle  
520       theft.
- 521       • Neighborhood sociodemographics: U.S. Census American Community Survey data will  
522       be used to characterize participants' block groups by their racial and ethnic composition



523 (e.g., % Black/African American, % White, % Hispanic), percentage of residents who are  
524 >65-year-olds, the average household size, and the percentage of residents who are  
525 limited English speakers.

526 • The total number of churches/worship places and civil society/membership/social clubs  
527 will be calculated for each block group from parcel-level data available from the Florida  
528 Geographic Data Library (FGDL).

529

530 *Neighborhood walk-friendly environment*

531 • Walking destinations and percentage retail: The total number of walking destinations  
532 will be calculated for each block group using parcel data from the FGDL. These  
533 destinations will include any business or public space that could facilitate social  
534 interactions and that may promote neighborhood walking, for example a post office,  
535 bank, grocery store or restaurant. Percentage retail space for each block group will be  
536 calculated using data on retail parcels (e.g., supermarkets, auto sales, shopping malls,  
537 professional services, restaurants/cafeterias, department stores).

538 • Number of pedestrian or bicycle crashes per year will be determined at the city-level  
539 using University of Florida's SIGNAL 4 Analytics program, which receives the data  
540 from the Florida Department of Highway Safety and Motor Vehicles (FLHSMV).

541 • Percentage sidewalk and crosswalk coverage: We will use the USGS National  
542 Transportation Dataset for road network data alongside high-resolution imagery taken  
543 from Google Earth Pro to manually delineate sidewalks next to roadways and crosswalks  
544 at intersections. For each block group, we will calculate the percentage of the roadways

545 with sidewalks and the percentage of all intersections that include a pedestrian  
546 crosswalk.

- 547 • Maximum road speed and annual average daily traffic (AADT) data were obtained from  
548 the Florida Department of Transportation (FDOT). Mean values for maximum road  
549 speed and AADT will be calculated for the roadways within each block group.
- 550 • Intersection density: Intersection density measures (auto-oriented, 3-legged/4-legged  
551 pedestrian-oriented), available from the Environmental Protection Agency’s Smart  
552 Location Database, are calculated as the number of intersections per square mile within  
553 each Census block group. A higher intersection density correlates with a more walkable  
554 environment.
- 555 • Compact neighborhood score: The Compact Neighborhood Score will be determined for  
556 each block group from the Center for Neighborhood Technology Housing and  
557 Transportation Index data [60]. This measure highlights areas that are higher in density,  
558 mixed use, and pedestrian friendly situated closer to rail and transit stations.
- 559 • Transit Access Score and Transit Connectivity Index will be determined for each block  
560 group from the Center for Neighborhood Technology Housing and Transportation Index  
561 data, which covers over 200 metrics that help analyze the social and economic impact of  
562 transit (e.g., land area accessible from a block group within a 30 minute transit trip, the  
563 number of bus routes and train stations within walking distance for households in a block  
564 group, frequency of service for public transport).

565

566

567 *Neighborhood Indices*

568 The composite Healthy Neighborhood Index (HNI) is calculated as the average of the weighted  
569 standardized scores for the four domains or sub-indices (i.e., green environment, neighborhood  
570 SES, social environment, and walk friendly) converted to a standard normal percentile. The HNI  
571 is intended to capture the multidimensional nature of neighborhood-level factors associated with  
572 ADRD risk that cannot be explained by a single variable or a group of variables within a single  
573 domain. Data normalization is essential in composite indices as the underlying variables are often  
574 measured at different scales or units of analysis. A standard z-score calculation is used to normalize the  
575 data for the HNI composite score. Since z-score standardization requires data to be approximately  
576 normally distributed, univariate analysis is performed to identify variables with a skewed distribution and  
577 the presence of outliers. Scatter plots, box plots, or the Grubbs statistical test are employed to  
578 identify outliers. Log-10, natural log, square root, or the inverse normal method are common  
579 transformations used to create a new variable as a function  $f(X)$  of the original variable. The  
580 underlying variables for each domain or sub-index are examined for directional effect, and the z-  
581 score computation is adjusted to account for those effects. Weighting the underlying variables of  
582 each sub-index is an important consideration when different variables may have dissimilar  
583 effects on the neighborhood-level ADRD risks. In this study, we derive weights from Principal  
584 Component Analysis (PCA), specifically the component loadings matrix (post-rotation)  
585 representing the total unit ratio of explained variance for each variable loaded on a component.  
586 We compute a sub-index score for each of the four domains as the average of the underlying  
587 variables z-scores. The overall HNI index score is calculated by averaging the standard normal  
588 percentile of the four sub-components. Ordinary least squares regression analysis will be  
589 performed to gauge the internal validity of the HNI, where the HNI score will be used as the  
590 dependent variable and the four sub-indices as independent variables.

591

## 592 **Smartwatch sub-study data collection**

593 Smartwatches can passively and continuously monitor a person's routine behavior, including  
594 activity level and social interaction in real-time, using EMA responses and objective  
595 measurements, e.g. latitude, longitude. Their use in this study will provide a mechanism to model  
596 human behavior in naturalistic settings and to map digital behavior markers onto predicted  
597 clinical measures. Studying real-time data provides more detailed insights into immediate  
598 changes to behaviors and mood that occur when encountering low air quality or distressed  
599 environments and how this translates to cognitive performance.

600

601 Collected smartwatch sensor data will include accelerometer, gyroscope, heart rate, oxygen  
602 saturation, respiration rate, and location. The custom smartwatch app queries participants 4 times  
603 a day at random times during waking hours (between 8am and 8pm with a minimum one-hour  
604 gap between queries). If a user does not respond within 2 minutes, the app will repeat the query  
605 after a five-minute pause. If the user still does not respond, the app will wait until the next query  
606 time to interact with the user. The watch provides a notification in the late evening to charge the  
607 watch and in the early morning (if still on the charger) to put on the watch. We will synchronize  
608 smartwatch behavior markers and sensed location data with air quality readings and built and  
609 social environment data. Research Assistants will provide weekly check-in support for  
610 smartwatch participants.

611

612 The smartwatch measures are listed in Table 2. The daily queries ask participants to answer  
613 ecological momentary assessment (EMA) questions about their current state. Smartwatch

614 features are extracted through a fusion of EMA, self-reports, observational health assessments,  
615 participant demographics, and selected digital behavior markers. During each query, participants  
616 will be asked Likert scale (1=Not at all to 5=Very much) questions on their physical activity,  
617 mental health status, air quality, and whether smoke in the air bothered them. In addition, during  
618 the last query of the day, participants will be asked how much time they spent with neighbors,  
619 friends, or family, and how much time they spent with others in their neighborhood, and they  
620 complete four tasks. Task 1 is the validated n-back task, which displays three shapes and asks  
621 participants to answer (yes/no) as quickly and accurately as possible whether the displayed shape  
622 is the same as the one shown before. We custom-designed a smartwatch version of the n-back  
623 task that has demonstrated reliability and validity in everyday environments [61]. The n-back  
624 task is well suited for frequent use because it is short (45 seconds) and sensitive to within-subject  
625 variations without obfuscations caused by practice effects after baseline is reached. Task 2 is an  
626 audio journal, in which participants will be asked to use the watch microphone to describe what  
627 they did that day and how they felt about their day.

628  
629 We will then employ joint inference machine learning to predict each target variable from the  
630 combined set of features. We will report correlations between automatically derived and self-  
631 reported measures of activity and SI. To assist in ensuring a minimum 80% adherence rate, our  
632 software will alert RAs if a lapse of  $\geq 1$  day in data collection occurs. The RA will check in with  
633 participants each week, as well as times these lapses are detected, to answer questions about  
634 using the smartwatches.

635 **Table 2. Schedule of assessments for smartwatch sub-study**

| Data collected | Agricultural non-burn period | Agricultural burn period |
|----------------|------------------------------|--------------------------|
|----------------|------------------------------|--------------------------|

|                                                                                                                                                                                                                                                                                                                                                                                                                                                                                                                                                                                        |                                                        |                                                        |
|----------------------------------------------------------------------------------------------------------------------------------------------------------------------------------------------------------------------------------------------------------------------------------------------------------------------------------------------------------------------------------------------------------------------------------------------------------------------------------------------------------------------------------------------------------------------------------------|--------------------------------------------------------|--------------------------------------------------------|
| Smartwatch sensor data: oxygen saturation, respiration rate, and location                                                                                                                                                                                                                                                                                                                                                                                                                                                                                                              | Continuously measured for 1 month                      | Continuously measured for 1 month                      |
| EMA: <ul style="list-style-type: none"> <li>In the past 30 minutes, how physically active have you been?</li> <li>In the past 30 minutes, how much have you felt anxious, depressed, or irritable?</li> <li>In the past 30 minutes, how clean has the air seemed to you?</li> <li>In the past 30 minutes, how much has smoke in the air bothered you?</li> <li>Today, how much did you spend time with neighbors, friends, or family? (only asked at last prompt)</li> <li>Today, how much time did you spend with others in your neighborhood? (only asked at last prompt)</li> </ul> | 4 prompts a day, daily for 1 month                     | 4 prompts a day, daily for 1 month                     |
| Tasks: <ul style="list-style-type: none"> <li>n-back</li> <li>Audio journal</li> </ul>                                                                                                                                                                                                                                                                                                                                                                                                                                                                                                 | Once a day (last prompt of the day), daily for 1 month | Once a day (last prompt of the day), daily for 1 month |

EMA = Ecological Momentary Assessment

636

637 The following statistics are calculated for each data source by day and overall: mean, standard

638 deviation, min, max, power, zero crossing, skewness, kurtosis, peaks, autocorrelation. Data

639 sources include the raw sensor values collected by the smartwatch. They also include the

640 following digital markers:

641 

- Activity level, total time for sleep, eat, work, exercise, relax, errands, travel, walk, run,

642 lie down, based on automatically recognized activities

643 

- Audio journal sound features: pitch, rate, intensity, spectrum, formants, harmonicity,

644 MFCC, pauses and duration, speech beats/minute, FO

- 645 • Audio journal text features (based on speech-to-text conversion): unique phrases/words,  
646 characters/word, SMOG, named entities, sentiment/mood markers, LIWC, TF-IDF,  
647 word embeddings, LDA
- 648 • Location: distance/bearing from home, distance travelled, durations at frequented  
649 locations, transitions, air quality and temperature
- 650 • N-back: score statistics, score slope and y-intercept, convergence rate, convergence  
651 mean
- 652 • EMA: response values, response rate

653

#### 654 **Data management plan and security**

655 A Data Safety Management Plan is in effect and overseen by the Florida Atlantic University  
656 Data Safety Management Officer. To minimize risk of breach of confidentiality, all informed  
657 consents and study materials will be entered on encrypted, password-protected computers using  
658 an electronic REDCap database. This database will be accessible only to the authorized research  
659 team members and will be stored on secure servers at Florida Atlantic University. A dual  
660 authentication and University-issued password is required to access this database. Using brief,  
661 efficient, and culturally sensitive methods for measurement, we will take every precaution to  
662 ensure confidentiality.

663

664

665

#### 666 **Safety considerations**

667 A Data Safety Monitoring Board is not required for this observational cohort study. There are  
668 minimal risks associated with study measures and assessments. Data collection occurs during a  
669 one-on-one visit between the community research assistant (CRA) and participant in private  
670 settings. Embarrassment about performance, fatigue, or stress from discussion about  
671 psychosocial situations may occur. The experienced research team of healthcare professionals is  
672 prepared to deal with participant concerns and make referrals if needed. In the unlikely event  
673 that any adverse event does occur, such as a physical fall or breach of confidentiality, the FAU  
674 Institutional Review Board will be notified.

675

#### 676 **Sample size/power**

677 *Sample Size Calculations for full sample.* Sample size estimates were made to attain .8 power for  
678 Aims 1 and 2. The intraclass correlation was assumed to be .05 based on the cluster of  
679 neighborhoods within rural communities. For Aim 1a, an assumed effect size of  $d = .35$  of the  
680 effect of  $PM_{2.5}$  on AD RD risk across burn seasons during the 3-year period was based on prior  
681 studies of cognitive decline and all-cause dementia in women related to  $PM_{2.5}$  [62]. Assuming 20  
682 persons sampled per  $PM_{2.5}$  monitor area, this resulted in monitors covering 7 neighborhood block  
683 groups per community or  $N = 660$  stratified across the 5 communities. For Aim 1b, effect size  
684 estimates for racial differences were based on findings of an approximately a twofold difference  
685 in hazard ratios of incident AD based on  $PM_{2.5}$  for non-Hispanic Black women compared to non-  
686 Hispanic White women or a difference in Cohen's  $d = .45$  [63] Assuming 20 persons sampled  
687 per  $PM_{2.5}$  monitor area, sample size estimates for power = .8 for the interaction of burn season by  
688 race, resulted in monitors covering at least 10 neighborhood block groups in each community for  
689 a total sample size of  $N = 1,000$  stratified across the five communities. For Aim 2a, an assumed



690 effect size of the built environment on cognitive function of  $d = .325$  was based on Besser's  
691 study finding of the relationship of proportion retail in 1/2-mile buffer to digit symbol coding as  
692 a measure of processing speed [64]. Assuming 20 persons sampled per neighborhood (census  
693 block), the sample size to detect an effect of the built environment on ADRD risk required six  
694 block groups per community for a total sample size of  $N = 600$  stratified across five  
695 communities. Because Aim 1b provides the limiting sample size, the target sample size will be  
696 1,000. Although there is a lack of literature to base the effect size for Aim 2b, the minimally  
697 detectable effect size with number of neighborhood block groups equal to 10 and  $n = 20$  is  $d$   
698  $= .38$ . To account for 8% attrition [65-67], 1,087 participants will be recruited for the study.  
699 Conversions among risk measures and Cohen's  $d$  were made in accordance with prior research  
700 and assumed a base rate = 0.107 of all-cause dementia [68]. Power analysis programs for mixed  
701 linear models, GLIMMPSE [69] CRT Shiny App [70] and PowerUp! [71] were used in these  
702 calculations.

703  
704 *Sample size calculations for subsample.* For Aim 3, based on our prior observation of predictive  
705 correlations between smartwatch-derived behavior markers e.g. activity and clinical measures of  
706 CF i.e. MoCA) [72], we assume an effect size of clinical prediction from behavior markers of  $d$   
707  $= 0.52$ . Estimated effect size is adjusted to account for self-report error [73]. Momentary  
708 readings from a sample of  $N = 120$  is large enough to calculate 99% power for hypothesis tests.  
709 In prior studies, we found that sample sizes smaller than these provided sufficient power to  
710 evaluate learning performance [74].

711

712 **Planned statistical analyses by aim**

713 *Conceptual model.* The statistical analysis plan is guided by our conceptual model linking  
714 neighborhood-level characteristics including PM<sub>2.5</sub> exposure, social isolation, and cognitive  
715 function/ADRD risk in Figure 2.  
716

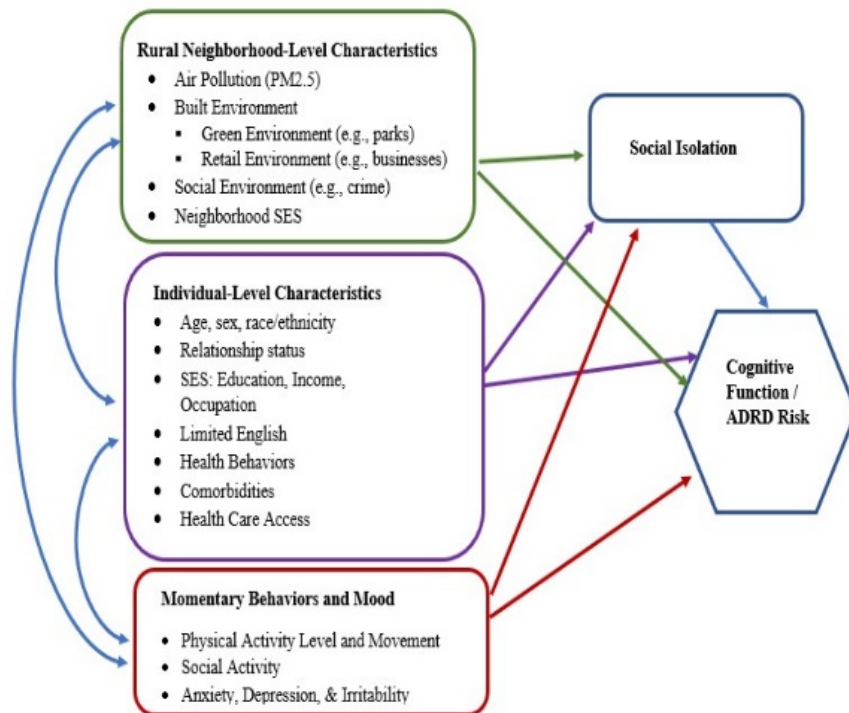

717 **Figure 2.** Conceptual model

718  
719 *Aim 1A.* General linear mixed model (GLMM) analyses with year and season nested in  
720 participants within neighborhood block groups will be conducted for Aim 1A to evaluate the  
721 effects of changes in PM<sub>2.5</sub> averaged over burn and non-burn seasons, as well as other temporal  
722 integration windows, on CF and SI. Controlling for random variance in outcomes across  
723 neighborhood block groups protects against inflated Type I errors due to neighborhood-level  
724 intraclass correlations. Additionally, linear and curvilinear trajectories for CF/ADRD risk and SI  
725 over the 3-year period associated with PM<sub>2.5</sub> levels will be assessed using multilevel linear

726 growth modeling. Both time-varying (e.g., health behaviors, work and home environments,  
727 comorbidities) and time-invariant (e.g., sex) individual- and neighborhood-level covariates (see  
728 Figure 1) will be incorporated into prediction models to control for these additional individual  
729 and neighborhood/community influences on the outcomes.

730

731 *Aim 1B.* Building on the analyses of Aim 1A, GLMM will be employed in Aim 1B to examine  
732 effect modification of Aim 1A (i.e., the differential effect of race/ethnicity on the effect of PM<sub>2.5</sub>  
733 on CF and SI) through cross-level interactions of participant race/ethnicity, as well as CF and SI  
734 changes over burn season and year, controlling for neighborhood and covariate effects, as  
735 determined in Aim 1A.

736

737 *Aim 2A.* General linear mixed model analyses of participants nested within neighborhoods (i.e.,  
738 census block groups) will be used to examine the effect of built and social environments on CF  
739 and SI for Aim 2A. Primary analysis will model effects of the four domains of social and built  
740 environment and the HNI on baseline CF and SI and on changes over 36 months, accounting for  
741 random neighborhood-level variance. Both time-varying (e.g., health behaviors, work and home  
742 environments, comorbidities) and time-invariant (e.g., sex) individual- and neighborhood-level  
743 covariates (see Figure 1) will be incorporated into prediction models to control for these  
744 additional individual and neighborhood/community influences on outcomes.

745

746 *Aim 2B.* Building on the analyses for Aim 2A, GLMM will be employed in Aim 2B to examine  
747 effect modification of Aim 2A (i.e., the differential effect of race/ethnicity on the effects of built  
748 and social environments on CF/ADRD risk and SI) by estimating cross-level interactions of

749 race/ethnicity and built and social environments on the outcomes, controlling for neighborhood  
750 and covariate effects, as determined in Aim 2A.

751  
752 *Aims 3A and 3B.* Random forests, convolutional neural networks, and gradient-boosted models  
753 will predict clinical measures and will be evaluated using leave-one-subject-out validation.  
754 Performance will be compared with mean and median baseline predictions for statistical  
755 significance. The primary analysis will model effects of activity level, social activity, and built  
756 environment averaged over burn season and year, although changes over time will also be  
757 assessed. Based on a continuous collection of over 8 weeks from 120 participants, we will collect  
758 at least 1.5 billion movement readings, 625,000 locations, 43,000 EMA responses, and 3,000 n-  
759 back scores. We will use the EMA responses, n-back scores, and ADRD risk scores as our target  
760 variables. The independent variables used to form the machine learning feature vectors will be  
761 daily digital behavior markers for each participant.

762

### 763 **Ethical considerations and declarations**

764 The RRR study is funded by a U.S. National Institute on Aging grant (R01AG083925). The  
765 planned human subjects research has been approved via Florida Atlanta University's (FAU)  
766 Institutional Review Board (IRB), which is the single IRB (sIRB) that is relied upon by the  
767 collaborating institutions (University of Miami, Washington State University, University of  
768 Arizona, and Colorado State University).

769

770

### 771 **Dissemination and data sharing plan**

772 Study findings will be shared with the participants and communities under study via community  
773 presentations and will be disseminated more broadly via peer-reviewed publications and local,  
774 national, and international conference presentations. Data will be aggregated/summarized when  
775 sharing findings and no identifying information will be revealed.

776  
777 We will share all exposure data (e.g., PM<sub>2.5</sub> exposure data) by depositing these data with  
778 Mountain Scholar, a free-accessible repository collectively supported by institutions of higher  
779 education in Colorado and Wyoming (<https://lib.colostate.edu/find/csu-digital-repository/>).  
780 These data are accessible via digital object identifier and are open access; for example, the  
781 website for the preliminary exposure data for our study can be found at  
782 <http://dx.doi.org/10.25675/10217/193258>. This doi will be included in all of our presentations  
783 and publications so that outside research groups are made aware of this resource for use and can  
784 use this resource for independent studies.

785  
786 **DISCUSSION**  
787 The RRR cohort study will follow a diverse Florida cohort from predominantly rural  
788 communities over 36 months to examine the impact of smoke-related ambient PM<sub>2.5</sub> exposure  
789 and built and social environments on social isolation and cognitive decline. The Lake  
790 Okeechobee area provides a fitting setting to carry out the study aims due to its rare combination  
791 of ethnoracial diversity, greater neighborhood disadvantage, rural locale, and proximity to  
792 agricultural burning. Our study will be innovative in employing smartwatches and EMA over a  
793 two-month period, during burn and non-burn seasons, to assess momentary changes in

794 behavioral markers, mood, and cognitive performance associated with changes in air quality and  
795 the social and built environment.

796

797 The study has several strengths, including its large sample size and recruitment from numerous  
798 block groups across South Central Florida, which ensures a range of PM<sub>2.5</sub> and social and built  
799 environment exposures. Participants will be able to complete assessments in Spanish, English, or  
800 Haitian Creole, helping to ensure representation of the diverse residents living in the rural  
801 communities. We will use PM<sub>2.5</sub> data sources including deployed PurpleAir monitors to support  
802 more accurate estimation of temporal smoke-related PM<sub>2.5</sub> exposure. We will employ CRAs who  
803 are knowledgeable about the rural communities in the study, embracing the principle of  
804 increasing workforce diversity and community bridges between university and community  
805 settings and the “What Matters Most” caring science framework [75]. CRAs will contact  
806 participants bimonthly via phone or in-person visits to aid in retention. Despite these strengths,  
807 the study also has some limitations. Generalizability may be limited to diverse farming  
808 communities who often experience large health disparities. In addition, it is possible that we may  
809 experience trouble recruiting from some rural communities despite the Principal Investigator’s  
810 vast network of established collaborators in the study area. To combat this, we will constantly  
811 monitor recruitment numbers by community and will adjust our recruitment sources and  
812 strategies as necessary (e.g., working with faith-based leaders in those communities to determine  
813 alternative locations and organizations for recruitment and partnership).

814

815 This groundbreaking study will investigate the social and cognitive impacts of smoke-related  
816 PM<sub>2.5</sub> and social and built environments in rural and ethnoracially diverse populations. While

817 international studies have demonstrated health effects of agricultural burning, studies are limited  
818 in the U.S., and this would be one of the first U.S. studies to investigate agricultural burning in  
819 relation to cognitive health. Altogether, our findings will contribute significantly to the limited  
820 literature on this topic, identifying potential synergistic effects of individual and community  
821 characteristics on brain health inequities in a unique, rural setting of the U.S.

822 **Acknowledgements**

823 This study is supported by the National Institutes of Health/National Institute on Aging

824 (R01AG083925). We express our immense gratitude to our community partners and Research

825 Assistants.

826

827



## 829 **References**

- 830 1. Perry DC, Miller BL. Frontotemporal dementia. *Semin Neurol.* 2013;33(4):336-41.
- 831 2. McKeith IG, Dickson DW, Lowe J, Emre M, O'Brien JT, Feldman H, et al. Diagnosis  
832 and management of dementia with Lewy bodies: third report of the DLB Consortium.  
833 *Neurology.* 2005;65(12):1863-72.
- 834 3. McKhann GM, Knopman DS, Chertkow H, Hyman BT, Jack CR, Jr., Kawas CH, et al.  
835 The diagnosis of dementia due to Alzheimer's disease: recommendations from the National  
836 Institute on Aging-Alzheimer's Association workgroups on diagnostic guidelines for Alzheimer's  
837 disease. *Alzheimers Dement.* 2011;7(3):263-9.
- 838 4. Alzheimer's Association. What is Dementia? N.D. Available from:  
839 [https://www.alz.org/alzheimers-dementia/what-is-](https://www.alz.org/alzheimers-dementia/what-is-dementia?utm_source=google&utm_medium=paidsearch&utm_campaign=google_grants&utm_content=dementia&gad_source=1&gclid=Cj0KCQjw8--2BhCHARIsAF_w1gz_F34vDeR6f1odRfwcbm72gAU9H_U8XY7MAKMXelx3-g8-GnkYVBAAaAm0AEALw_wcB)  
840 [dementia?utm\\_source=google&utm\\_medium=paidsearch&utm\\_campaign=google\\_grants&utm\\_](https://www.alz.org/alzheimers-dementia/what-is-dementia?utm_source=google&utm_medium=paidsearch&utm_campaign=google_grants&utm_content=dementia&gad_source=1&gclid=Cj0KCQjw8--2BhCHARIsAF_w1gz_F34vDeR6f1odRfwcbm72gAU9H_U8XY7MAKMXelx3-g8-GnkYVBAAaAm0AEALw_wcB)  
841 [content=dementia&gad\\_source=1&gclid=Cj0KCQjw8--](https://www.alz.org/alzheimers-dementia/what-is-dementia?utm_source=google&utm_medium=paidsearch&utm_campaign=google_grants&utm_content=dementia&gad_source=1&gclid=Cj0KCQjw8--2BhCHARIsAF_w1gz_F34vDeR6f1odRfwcbm72gAU9H_U8XY7MAKMXelx3-g8-GnkYVBAAaAm0AEALw_wcB)  
842 [2BhCHARIsAF\\_w1gz\\_F34vDeR6f1odRfwcbm72gAU9H\\_U8XY7MAKMXelx3-g8-](https://www.alz.org/alzheimers-dementia/what-is-dementia?utm_source=google&utm_medium=paidsearch&utm_campaign=google_grants&utm_content=dementia&gad_source=1&gclid=Cj0KCQjw8--2BhCHARIsAF_w1gz_F34vDeR6f1odRfwcbm72gAU9H_U8XY7MAKMXelx3-g8-GnkYVBAAaAm0AEALw_wcB)  
843 [GnkYVBAAaAm0AEALw\\_wcB.](https://www.alz.org/alzheimers-dementia/what-is-dementia?utm_source=google&utm_medium=paidsearch&utm_campaign=google_grants&utm_content=dementia&gad_source=1&gclid=Cj0KCQjw8--2BhCHARIsAF_w1gz_F34vDeR6f1odRfwcbm72gAU9H_U8XY7MAKMXelx3-g8-GnkYVBAAaAm0AEALw_wcB)
- 844 5. Alzheimer's Association. 2023 Alzheimer's Disease Facts and Figures. 2023. Available  
845 from: <https://www.alz.org/media/documents/alzheimers-facts-and-figures.pdf>.
- 846 6. Livingston G, Huntley J, Liu KY, Costafreda SG, Selbaek G, Alladi S, et al. Dementia  
847 prevention, intervention, and care: 2024 report of the Lancet standing Commission. *Lancet.*  
848 2024;404(10452):572-628.
- 849 7. Adkins-Jackson PB, George KM, Besser LM, Hyun J, Lamar M, Hill-Jarrett TG, et al.  
850 The structural and social determinants of Alzheimer's disease related dementias. *Alzheimers*  
851 *Dement.* 2023;19(7):3171-85.

- 852 8. Centers for Disease Control and Prevention. About Social Determinants of Health  
853 (SDOH) 2021. Available from: <https://www.cdc.gov/socialdeterminants/about.html>.
- 854 9. Gomez CA, Kleinman DV, Pronk N, Wrenn Gordon GL, Ochiai E, Blakey C, et al.  
855 Addressing Health Equity and Social Determinants of Health Through Healthy People 2030. J  
856 Public Health Manag Pract. 2021;27(Suppl 6):S249-S57.
- 857 10. Besser LM, McDonald NC, Song Y, Kukull WA, Rodriguez DA. Neighborhood  
858 Environment and Cognition in Older Adults: A Systematic Review. Am J Prev Med. 2017;  
859 53(2):241-251.
- 860 11. Besser LM, Jimenez MP, Reimer CJ, Meyer OL, Mitsova D, George KM, et al. Diversity  
861 of Studies on Neighborhood Greenspace and Brain Health by Racialized/Ethnic Group and  
862 Geographic Region: A Rapid Review. Int J Environ Res Public Health. 2023;20(9).
- 863 12. Hunt JFV, Buckingham W, Kim AJ, Oh J, Vogt NM, Jonaitis EM, et al. Association of  
864 Neighborhood-Level Disadvantage With Cerebral and Hippocampal Volume. JAMA Neurol.  
865 2020;77(4):451-60.
- 866 13. Hunt JFV, Vogt NM, Jonaitis EM, Buckingham WR, Kosciak RL, Zuelsdorff M, et al.  
867 Association of Neighborhood Context, Cognitive Decline, and Cortical Change in an  
868 Unimpaired Cohort. Neurology. 2021;96(20):e2500-e12.
- 869 14. Wu Y-T, Prina AM, Brayne C. The association between community environment and  
870 cognitive function: a systematic review. Social Psychiatry and Psychiatric Epidemiology.  
871 2015;50(3):351-62.
- 872 15. US Department of Health and Human Services. Social Determinants of Health. N.D.  
873 Available from: <https://health.gov/healthypeople/objectives-and-data/social-determinants-health>.

- 874 16. Liu J, Clark LP, Bechle MJ, Hajat A, Kim SY, Robinson AL, et al. Disparities in Air  
875 Pollution Exposure in the United States by Race/Ethnicity and Income, 1990-2010. *Environ*  
876 *Health Perspect.* 2021;129(12):127005.
- 877 17. Grullon J SD, Wong R. Racial and ethnic disparities in social isolation and 11-year  
878 dementia risk among older adults in the United States. *Innov Aging.* 2023;7:104.
- 879 18. Wang Y, Shi L, Lee M, Liu P, Di Q, Zanobetti A, et al. Long-term Exposure to PM2.5  
880 and Mortality Among Older Adults in the Southeastern US. *Epidemiology.* 2017;28(2):207-14.
- 881 19. Maji KJ, Ford B, Li Z, Hu Y, Hu L, Langer CE, et al. Impact of the 2022 New Mexico,  
882 US wildfires on air quality and health. *Sci Total Environ.* 2024;946:174197.
- 883 20. Thiankhaw K, Chattipakorn N, Chattipakorn SC. PM2.5 exposure in association with  
884 AD-related neuropathology and cognitive outcomes. *Environ Pollut.* 2022;292(Pt A):118320.
- 885 21. Casey E, Li Z, Liang D, Ebel S, Levey AI, Lah JJ, et al. Association between Fine  
886 Particulate Matter Exposure and Cerebrospinal Fluid Biomarkers of Alzheimer's Disease among  
887 a Cognitively Healthy Population-Based Cohort. *Environ Health Perspect.* 2024;132(4):47001.
- 888 22. Brandt EB, Beck AF, Mersha TB. Air pollution, racial disparities, and COVID-19  
889 mortality. *J Allergy Clin Immunol.* 2020;146(1):61-3.
- 890 23. Tessum CW, Paoletta DA, Chambliss SE, Apte JS, Hill JD, Marshall JD. PM(2.5)  
891 pollutants disproportionately and systemically affect people of color in the United States. *Sci Adv.*  
892 2021;7(18).
- 893 24. Murthy VH. Our Epidemic of Loneliness and Isolation: The U.S. Surgeon General's  
894 Advisory on the Healing Effects of Social Connection and Community. 2023.
- 895 25. Joshi P, Hendrie K, Jester DJ, Dasarathy D, Lavretsky H, Ku BS, et al. Social  
896 connections as determinants of cognitive health and as targets for social interventions in persons

- 897 with or at risk of Alzheimer's disease and related disorders: a scoping review. *Int Psychogeriatr.*  
898 2024;36(2):92-118.
- 899 26. Cardona M, Andres P. Are social isolation and loneliness associated with cognitive  
900 decline in ageing? *Front Aging Neurosci.* 2023;15:1075563.
- 901 27. Gow AJ, Corley J, Starr JM, Deary IJ. Which social network or support factors are  
902 associated with cognitive abilities in old age? *Gerontology.* 59. Switzerland: Basel.; 2013. p.  
903 454-63.
- 904 28. Evans IEM, Martyr A, Collins R, Brayne C, Clare L. Social Isolation and Cognitive  
905 Function in Later Life: A Systematic Review and Meta-Analysis. *J Alzheimers Dis.*  
906 2019;70(s1):S119-S44.
- 907 29. Joyce J, Ryan J, Owen A, Hu J, McHugh Power J, Shah R, et al. Social isolation, social  
908 support, and loneliness and their relationship with cognitive health and dementia. *Int J Geriatr*  
909 *Psychiatry.* 2021;37(1).
- 910 30. Marioni RE, Proust-Lima C, Amieva H, Brayne C, Matthews FE, Dartigues JF, et al.  
911 Social activity, cognitive decline and dementia risk: a 20-year prospective cohort study. *BMC*  
912 *Public Health.* 2015;15:1089.
- 913 31. Shen C, Rolls ET, Cheng W, Kang J, Dong G, Xie C, et al. Associations of Social  
914 Isolation and Loneliness With Later Dementia. *Neurology.* 2022;99(2):e164-e75.
- 915 32. Chen X, Lee C, Huang H. Neighborhood built environment associated with cognition and  
916 dementia risk among older adults: A systematic literature review. *Soc Sci Med.*  
917 2022;292:114560.

- 918 33. Peterson RL, George KM, Tran D, Malladi P, Gilsanz P, Kind AJH, et al.  
919 Operationalizing Social Environments in Cognitive Aging and Dementia Research: A Scoping  
920 Review. *Int J Environ Res Public Health*. 2021;18(13):7166.
- 921 34. Lee BK, Glass TA, James BD, Bandeen-Roche K, Schwartz BS. Neighborhood  
922 psychosocial environment, apolipoprotein E genotype, and cognitive function in older adults.  
923 *Arch Gen Psychiatry*. 2011;68(3):314-21.
- 924 35. Besser LM, Meyer OL, Jones MR, Tran D, Booker M, Mitsova D, et al. Neighborhood  
925 segregation and cognitive change: Multi-Ethnic Study of Atherosclerosis. *Alzheimers Dement*.  
926 2022; 19(4):1143-1151.
- 927 36. Rahman M, White EM, Mills C, Thomas KS, Jutkowitz E. Rural-urban differences in  
928 diagnostic incidence and prevalence of Alzheimer's disease and related dementias. *Alzheimers*  
929 *Dement*. 2021;17(7):1213-30.
- 930 37. Wing JJ, Levine DA, Ramamurthy A, Reider C. Alzheimer's Disease and Related  
931 Disorders Prevalence Differs by Appalachian Residence in Ohio. *J Alzheimers Dis*.  
932 2020;76(4):1309-16.
- 933 38. National Center for Education Statistics. Educational Attainment in Rural Areas. 2023.
- 934 39. Chen X, Orom H, Hay JL, Waters EA, Schofield E, Li Y, et al. Differences in Rural and  
935 Urban Health Information Access and Use. *J Rural Health*. 2019;35(3):405-17.
- 936 40. Kirby JB, Yabroff KR. Rural-Urban Differences in Access to Primary Care: Beyond the  
937 Usual Source of Care Provider. *Am J Prev Med*. 2020;58(1):89-96.
- 938 41. The Housing Assistance Council. Race and ethnicity in rural America. 2012.
- 939 42. United States Census Bureau. Quick Facts: United States N.D. Available from:  
940 <https://www.census.gov/quickfacts/>.

- 941 43. Nowell HK, Wirks C, Val Martin M, van Donkelaar A, Martin RV, Uejio CK, et al.  
942 Impacts of Sugarcane Fires on Air Quality and Public Health in South Florida. *Environ Health*  
943 *Perspect.* 2022;130(8):87004.
- 944 44. Sablan O FB, Gargulinski E, Henery G, Rosen Z, Slater K, Wiese LK, Williams CL, Soja  
945 AJ, Magzamen S, Pierce JR, Fischer EV, editor 26ATCHEM Quantifying Smoke from  
946 Sugarcane Burning in Florida during the 2022-2023 Season. American Meteorological Society  
947 Annual Meeting; 2024; Baltimore, MD.
- 948 45. Dujardin K, Duhem S, Guerouaou N, Djelad S, Drumez E, Duhamel A, et al. Validation  
949 in French of the Montreal Cognitive Assessment 5-Minute, a brief cognitive screening test for  
950 phone administration. *Rev Neurol (Paris)*. 2021;177(8):972-9.
- 951 46. Freitas S, Simoes MR, Alves L, Santana I. Montreal cognitive assessment: validation  
952 study for mild cognitive impairment and Alzheimer disease. *Alzheimer Dis Assoc Disord*.  
953 2013;27(1):37-43.
- 954 47. White JP, Schembri A, Prenn-Gologranc C, Ondrus M, Katina S, Novak P, et al.  
955 Sensitivity of Individual and Composite Test Scores from the Cogstate Brief Battery to Mild  
956 Cognitive Impairment and Dementia Due to Alzheimer's Disease. *J Alzheimers Dis*.  
957 2023;96(4):1781-99.
- 958 48. Bransby L, Rosenich E, Buckley RF, Yassi N, Pase MP, Maruff P, et al. Multidomain  
959 modifiable dementia risk factors are associated with poorer cognition in midlife.  
960 *Neuropsychology*. 2023;37(5):582-94.
- 961 49. Bush K, Kivlahan DR, McDonnell MB, Fihn SD, Bradley KA. The AUDIT alcohol  
962 consumption questions (AUDIT-C): an effective brief screening test for problem drinking.

- 963 Ambulatory Care Quality Improvement Project (ACQUIP). Alcohol Use Disorders Identification  
964 Test. Arch Intern Med. 1998;158(16):1789-95.
- 965 50. HealthMeasures. PROMIS short form v2.0-social isolation 4a. 2022. Available from:  
966 [https://www.healthmeasures.net/index.php?option=com\\_instruments&view=measure&id=209&I](https://www.healthmeasures.net/index.php?option=com_instruments&view=measure&id=209&Itemid=992)  
967 [temid=992](https://www.healthmeasures.net/index.php?option=com_instruments&view=measure&id=209&Itemid=992).
- 968 51. Lubben J, Blozik E, Gillmann G, Iliffe S, von Renteln Kruse W, Beck JC, et al.  
969 Performance of an abbreviated version of the Lubben Social Network Scale among three  
970 European community-dwelling older adult populations. Gerontologist. 2006;46(4):503-13.
- 971 52. Berkman LF, Syme SL. Social networks, host resistance, and mortality: a nine-year  
972 follow-up study of Alameda County residents. Am J Epidemiol. 1979;109(2):186-204.
- 973 53. de Jong Gierveld J, Keating N, Fast JE. Determinants of Loneliness among Older Adults  
974 in Canada. Can J Aging. 2015;34(2):125-36.
- 975 54. Pilkonis PA, Choi SW, Reise SP, Stover AM, Riley WT, Cella D, et al. Item banks for  
976 measuring emotional distress from the Patient-Reported Outcomes Measurement Information  
977 System (PROMIS(R)): depression, anxiety, and anger. Assessment. 2011;18(3):263-83.
- 978 55. HealthMeasures. Sleep Scoring Manual. 2021. Available from:  
979 [https://www.healthmeasures.net/images/PROMIS/manuals/Scoring\\_Manual\\_Only/PROMIS\\_Sle](https://www.healthmeasures.net/images/PROMIS/manuals/Scoring_Manual_Only/PROMIS_Sleep_Scoring_Manual.pdf)  
980 [ep\\_Scoring\\_Manual.pdf](https://www.healthmeasures.net/images/PROMIS/manuals/Scoring_Manual_Only/PROMIS_Sleep_Scoring_Manual.pdf).
- 981 56. HealthMeasures. Physical function scoring manual. 2021. Available from:  
982 [https://www.healthmeasures.net/images/PROMIS/manuals/Scoring\\_Manuals\\_/PROMIS\\_Physica](https://www.healthmeasures.net/images/PROMIS/manuals/Scoring_Manuals_/PROMIS_Physical_Function_Scoring_Manual.pdf)  
983 [l\\_Function\\_Scoring\\_Manual.pdf](https://www.healthmeasures.net/images/PROMIS/manuals/Scoring_Manuals_/PROMIS_Physical_Function_Scoring_Manual.pdf).

- 984 57. Healthmeasures. Fatigue Scoring Manual. 2021. Available from:  
985 [https://www.healthmeasures.net/images/PROMIS/manuals/Scoring\\_Manuals\\_/PROMIS\\_Fatigue](https://www.healthmeasures.net/images/PROMIS/manuals/Scoring_Manuals_/PROMIS_Fatigue)  
986 [\\_Scoring\\_Manual.pdf](https://www.healthmeasures.net/images/PROMIS/manuals/Scoring_Manuals_/PROMIS_Fatigue_Scoring_Manual.pdf).
- 987 58. HealthMeasures. Pain Interference Scoring Manual. 2021. Available from:  
988 [https://www.healthmeasures.net/images/PROMIS/manuals/Scoring\\_Manual\\_Only/PROMIS\\_Pain](https://www.healthmeasures.net/images/PROMIS/manuals/Scoring_Manual_Only/PROMIS_Pain)  
989 [n\\_Interference\\_Scoring\\_Manual\\_03June2022.pdf](https://www.healthmeasures.net/images/PROMIS/manuals/Scoring_Manual_Only/PROMIS_Pain_Interference_Scoring_Manual_03June2022.pdf).
- 990 59. HealthMeasures. Ability to Participate in Social Roles and Activities. 2021. Available  
991 from:  
992 [https://www.healthmeasures.net/images/promis/manuals/PROMIS\\_Ability\\_to\\_Participate\\_in\\_So](https://www.healthmeasures.net/images/promis/manuals/PROMIS_Ability_to_Participate_in_Social)  
993 [cial\\_Roles\\_and\\_Activities\\_Scoring\\_Manual.pdf](https://www.healthmeasures.net/images/promis/manuals/PROMIS_Ability_to_Participate_in_Social_Roles_and_Activities_Scoring_Manual.pdf).
- 994 60. Center for Neighborhood Technology. H+T Index Methods. 2022. Available from:  
995 <https://htaindex.cnt.org/about/method-2022.pdf>.
- 996 61. Schmitter-Edgecombe M, Luna C, Dai S, Cook DJ. Predicting daily cognition and  
997 lifestyle behaviors for older adults using smart home data and ecological momentary assessment.  
998 *Clin Neuropsychol.* 2024;1-25.
- 999 62. Cacciottolo M, Wang X, Driscoll I, Woodward N, Saffari A, Reyes J, et al. Particulate air  
1000 pollutants, APOE alleles and their contributions to cognitive impairment in older women and to  
1001 amyloidogenesis in experimental models. *Transl Psychiatry.* 2017;7(1):e1022.
- 1002 63. Younan D, Wang X, Gruenewald T, Gatz M, Serre ML, Vizuete W, et al. Racial/Ethnic  
1003 Disparities in Alzheimer's Disease Risk: Role of Exposure to Ambient Fine Particles. *J Gerontol*  
1004 *A Biol Sci Med Sci.* 2022;77(5):977-85.



- 1005 64. Besser LM, Chang LC, Evenson KR, Hirsch JA, Michael YL, Galvin JE, et al.  
1006 Associations Between Neighborhood Park Access and Longitudinal Change in Cognition in  
1007 Older Adults: The Multi-Ethnic Study of Atherosclerosis. *J Alzheimers Dis.* 2021;82(1):221-33.
- 1008 65. Abdul-Akbar PM, Wiese L. Investigating Relationships Between Hypertension, Sleep,  
1009 and Cognitive Risk in an Underserved Community. *Online J Rural Nurs Health Care.*  
1010 2020;20(1):70-89.
- 1011 66. Wiese LK, Williams CL, Hain D, Newman D, Houston CP, Kaack C, et al. Detecting  
1012 dementia among older, ethnically diverse residents of rural subsidized housing. *Geriatr Nurs.*  
1013 2021;42(2):524-32.
- 1014 67. Besser LM, Chang LC, Hirsch JA, Rodriguez DA, Renne J, Rapp SR, et al. Longitudinal  
1015 Associations between the Neighborhood Built Environment and Cognition in US Older Adults:  
1016 The Multi-Ethnic Study of Atherosclerosis. *Int J Environ Res Public Health.* 2021; 18(15):7973.
- 1017 68. Alzheimer's Association. 2022 Alzheimer's Disease Facts and Figures. 2022. Available  
1018 from: <https://www.alz.org/media/Documents/alzheimers-facts-and-figures.pdf>.
- 1019 69. Kreidler SM, Muller KE, Grunwald GK, Ringham BM, Coker-Dukowitz ZT, Sakhadeo  
1020 UR, et al. GLIMMPSE: Online Power Computation for Linear Models with and without a  
1021 Baseline Covariate. *J Stat Softw.* 2013;54(10).
- 1022 70. Hemming K, Kasza J, Hooper R, Forbes A, Taljaard M. A tutorial on sample size  
1023 calculation for multiple-period cluster randomized parallel, cross-over and stepped-wedge trials  
1024 using the Shiny CRT Calculator. *Int J Epidemiol.* 2020;49(3):979-95.
- 1025 71. Dong N, Kelcey B, Spybrook J. Design considerations in multisite randomized trials to  
1026 probe moderated treatment effects. *Journal of Educational and Behavioral Statistics.*  
1027 2020;46(5):527-559.

- 1028 72. Julayanont P, Tangwongchai S, Hemrungrojn S, Tunvirachaisakul C, Phanthumchinda K,  
1029 Hongsawat J, et al. The Montreal Cognitive Assessment-Basic: A Screening Tool for Mild  
1030 Cognitive Impairment in Illiterate and Low-Educated Elderly Adults. *J Am Geriatr Soc*.  
1031 2015;63(12):2550-4.
- 1032 73. Lucas RE. Reevaluating the strengths and weaknesses of self-report measures of  
1033 subjective well-being. In: Diener E OS, Tay L, editor. *In Handbook of Well-Being*. Salt Lake  
1034 City, UT: DEF Publishers; 2018. p. 1-12.
- 1035 74. Cook D S-EM. Fusing ambient and mobile sensor features into a behaviorome for  
1036 predicting clinical health scores. *IEEE Access*. 2021;2:65033–43.
- 1037 75. Boykin A SS. *Nursing as caring: A model for transforming practice*: Jones & Bartlett  
1038 Learning; 2001.
- 1039
- 1040

Lake Okeechobee:

- Locations
- EPA Monitor
- Study Area\*

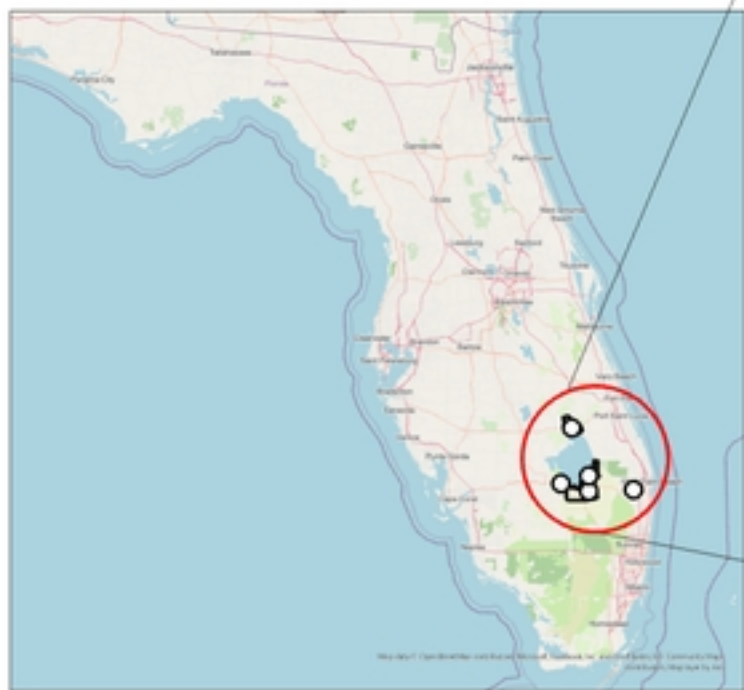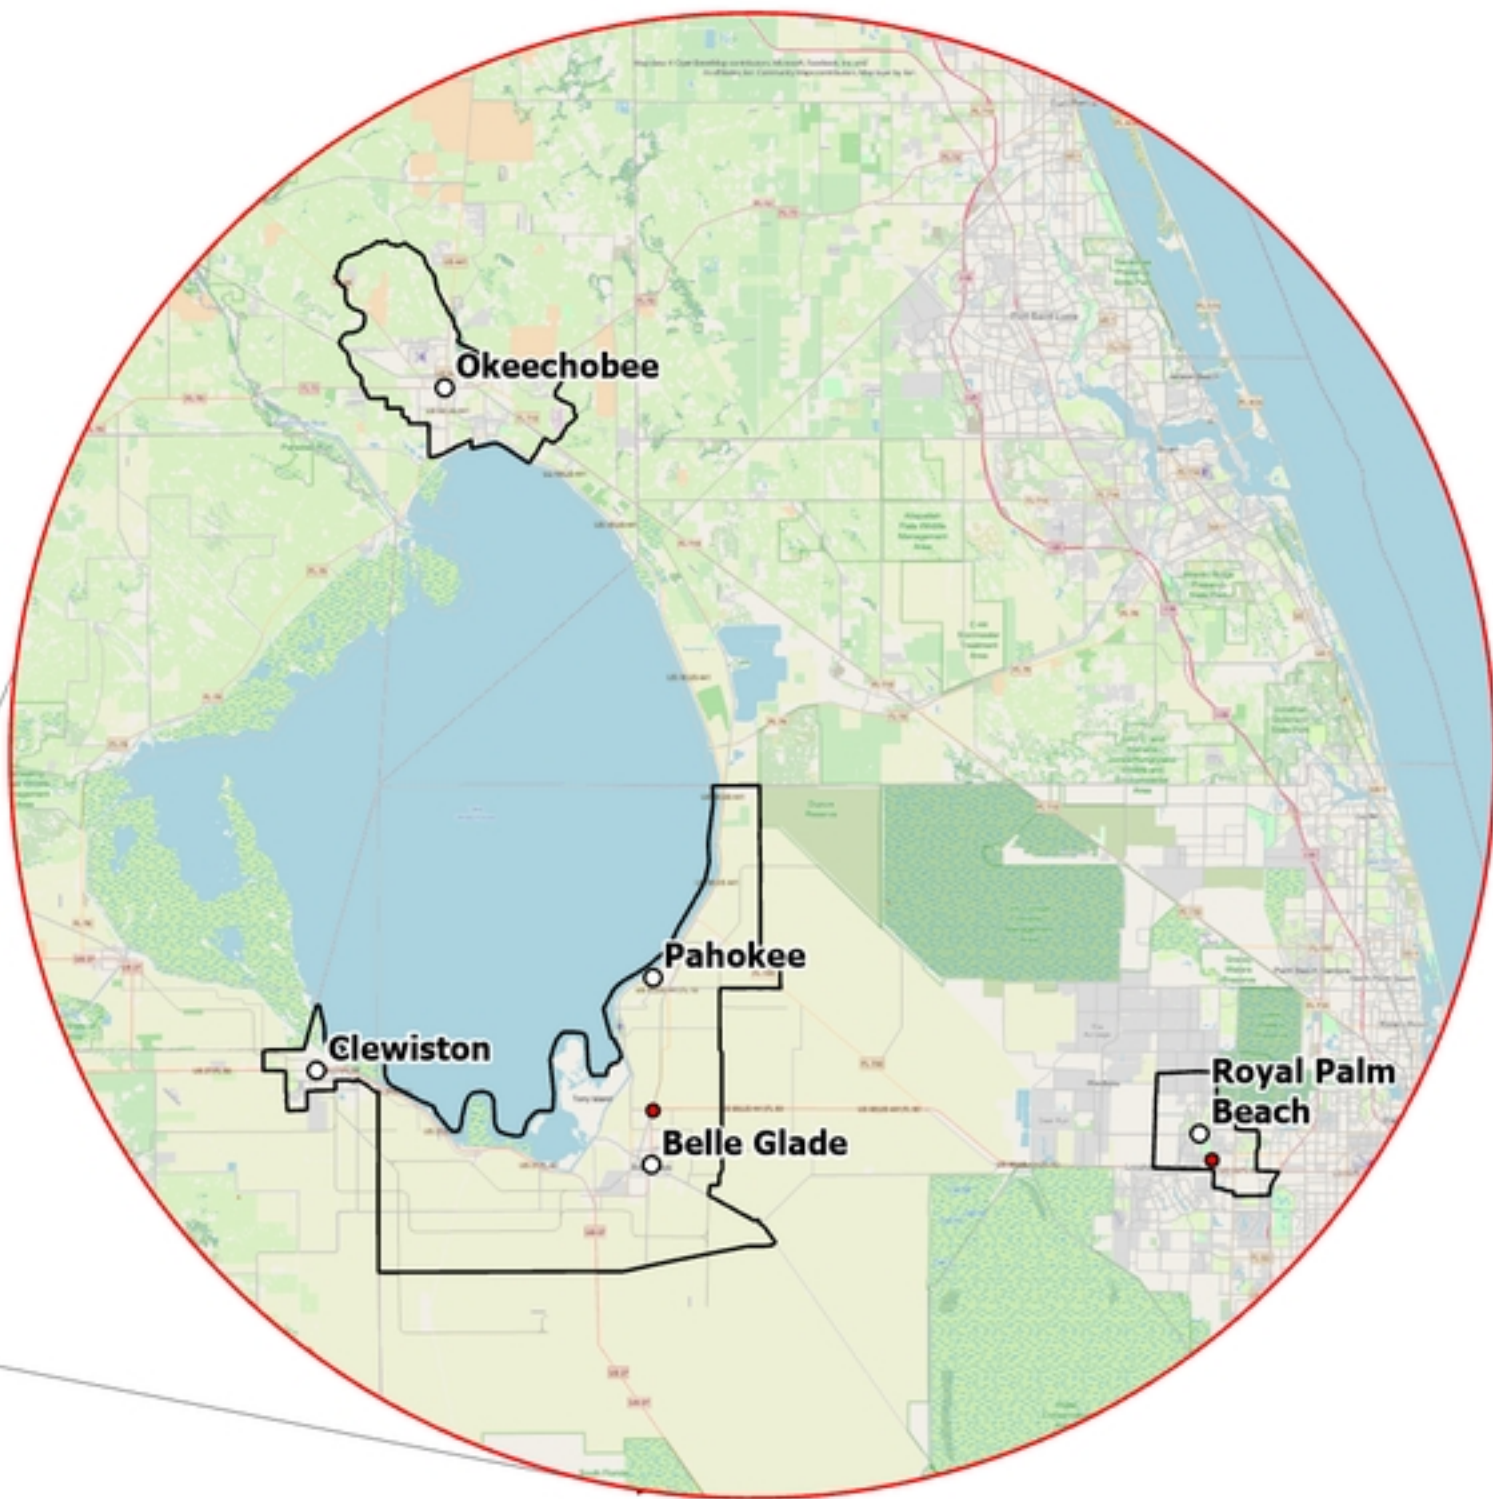

Figure 1

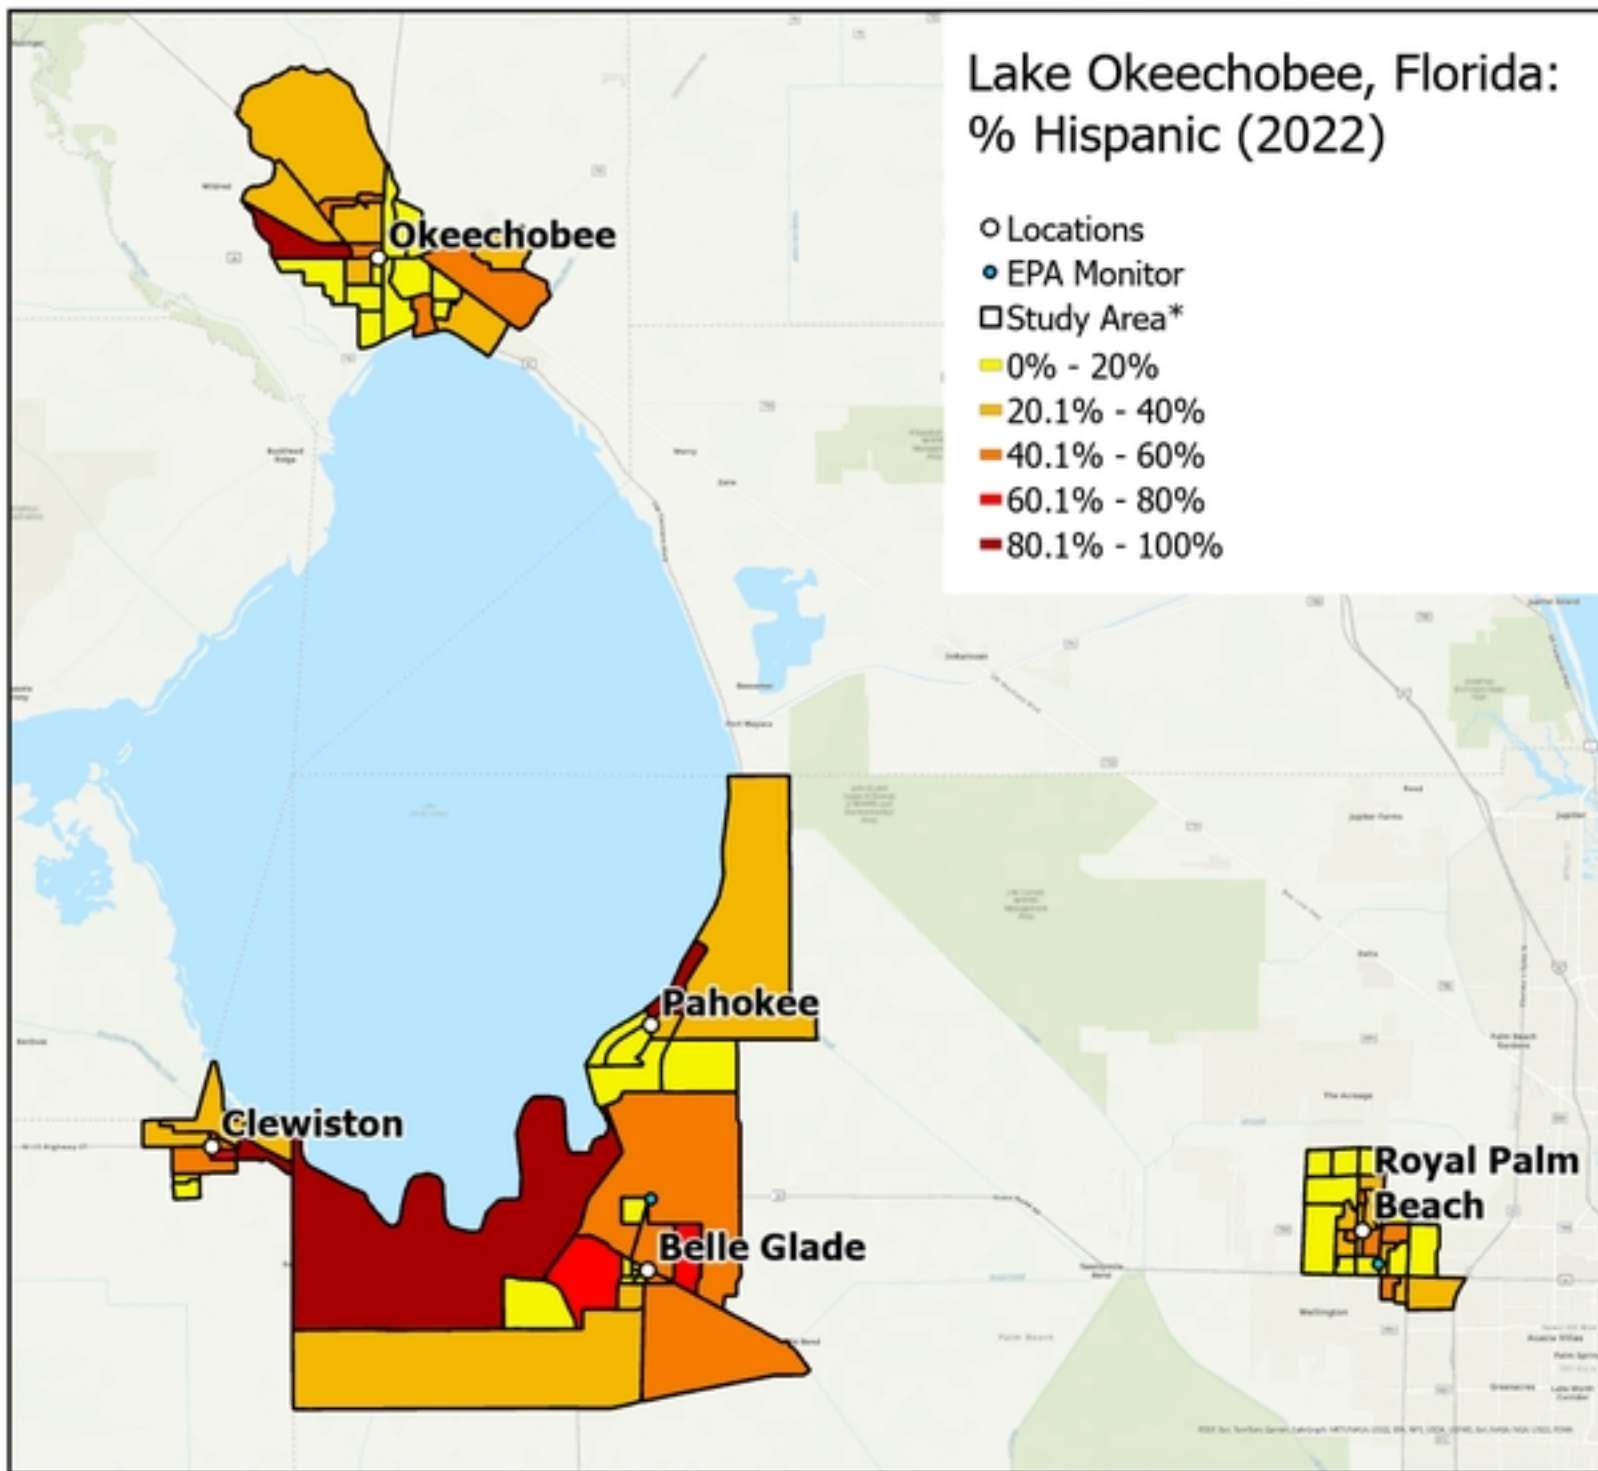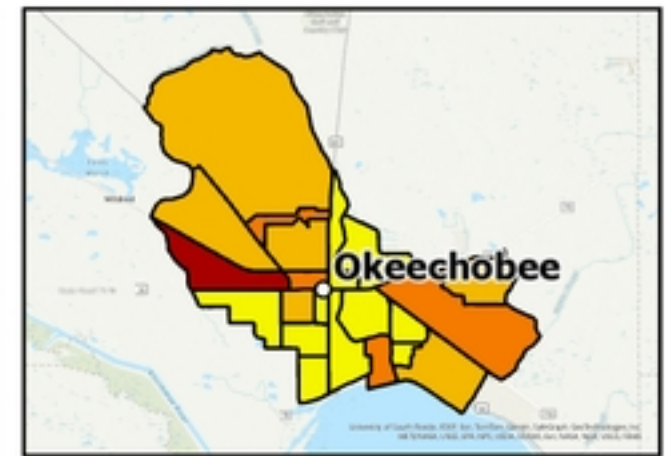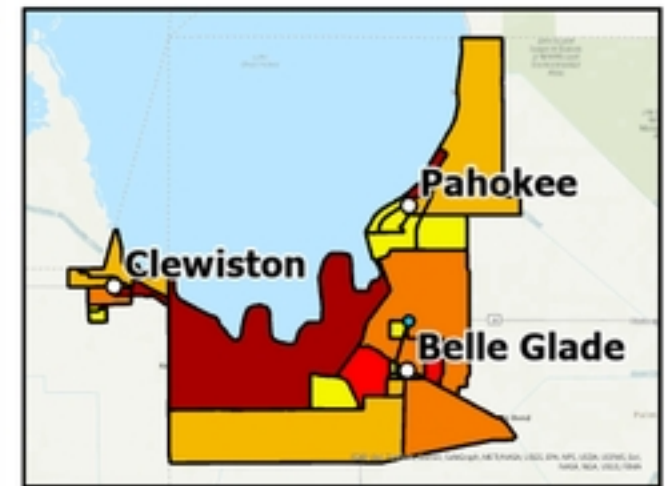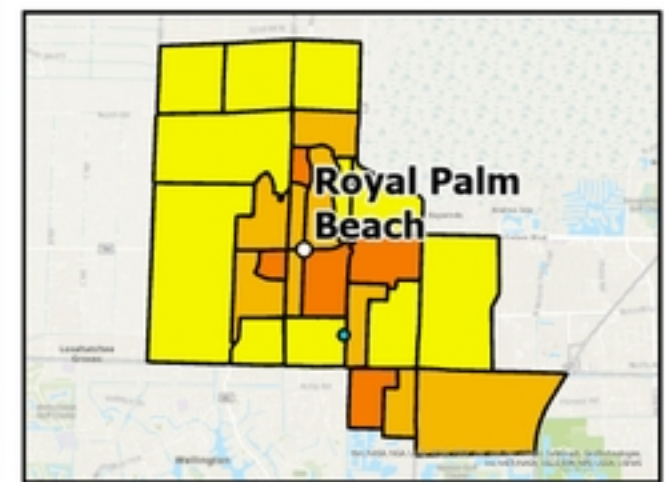

Figure 2



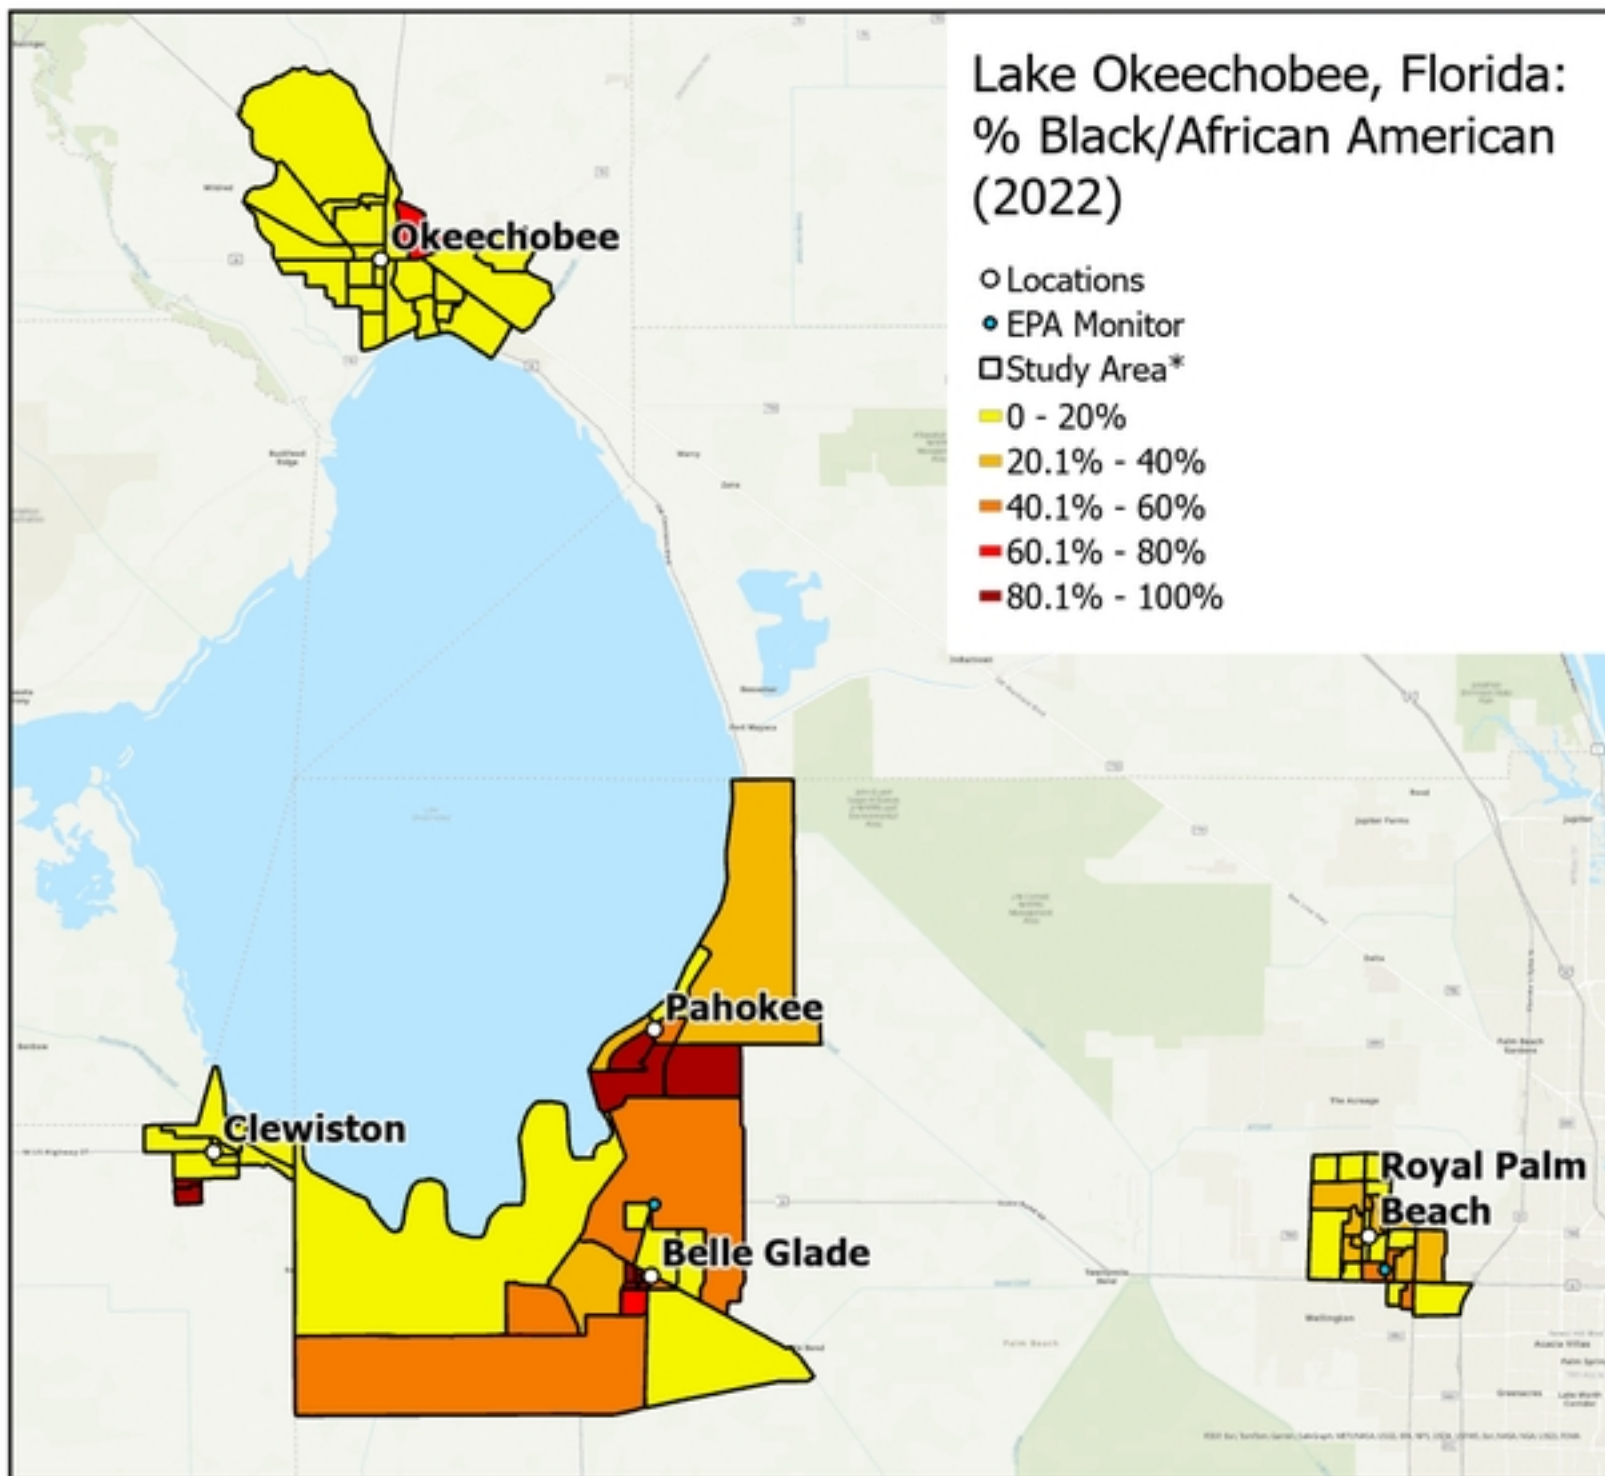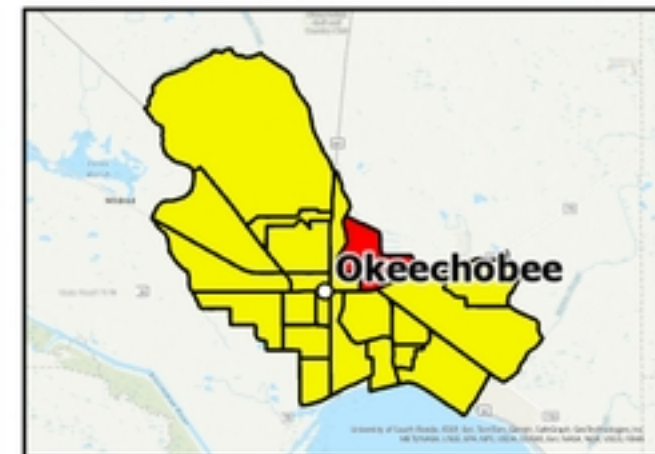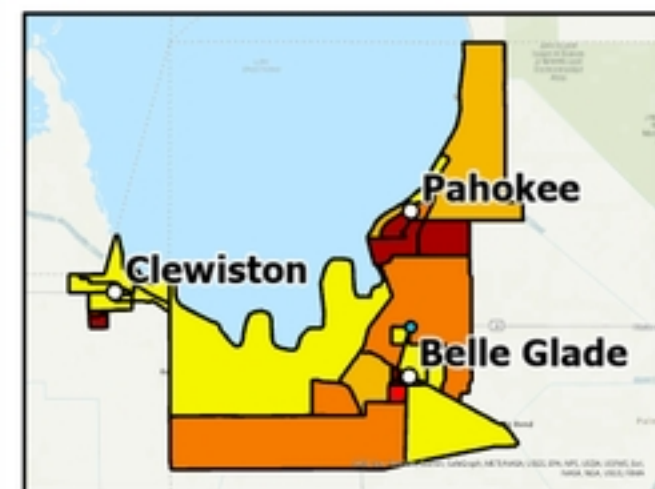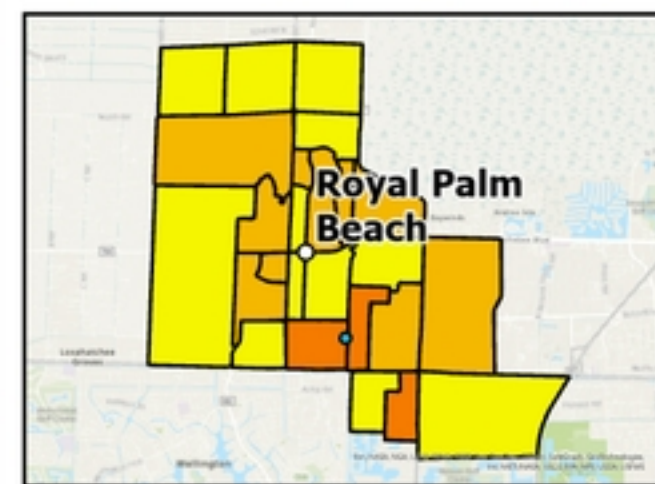

Figure 3

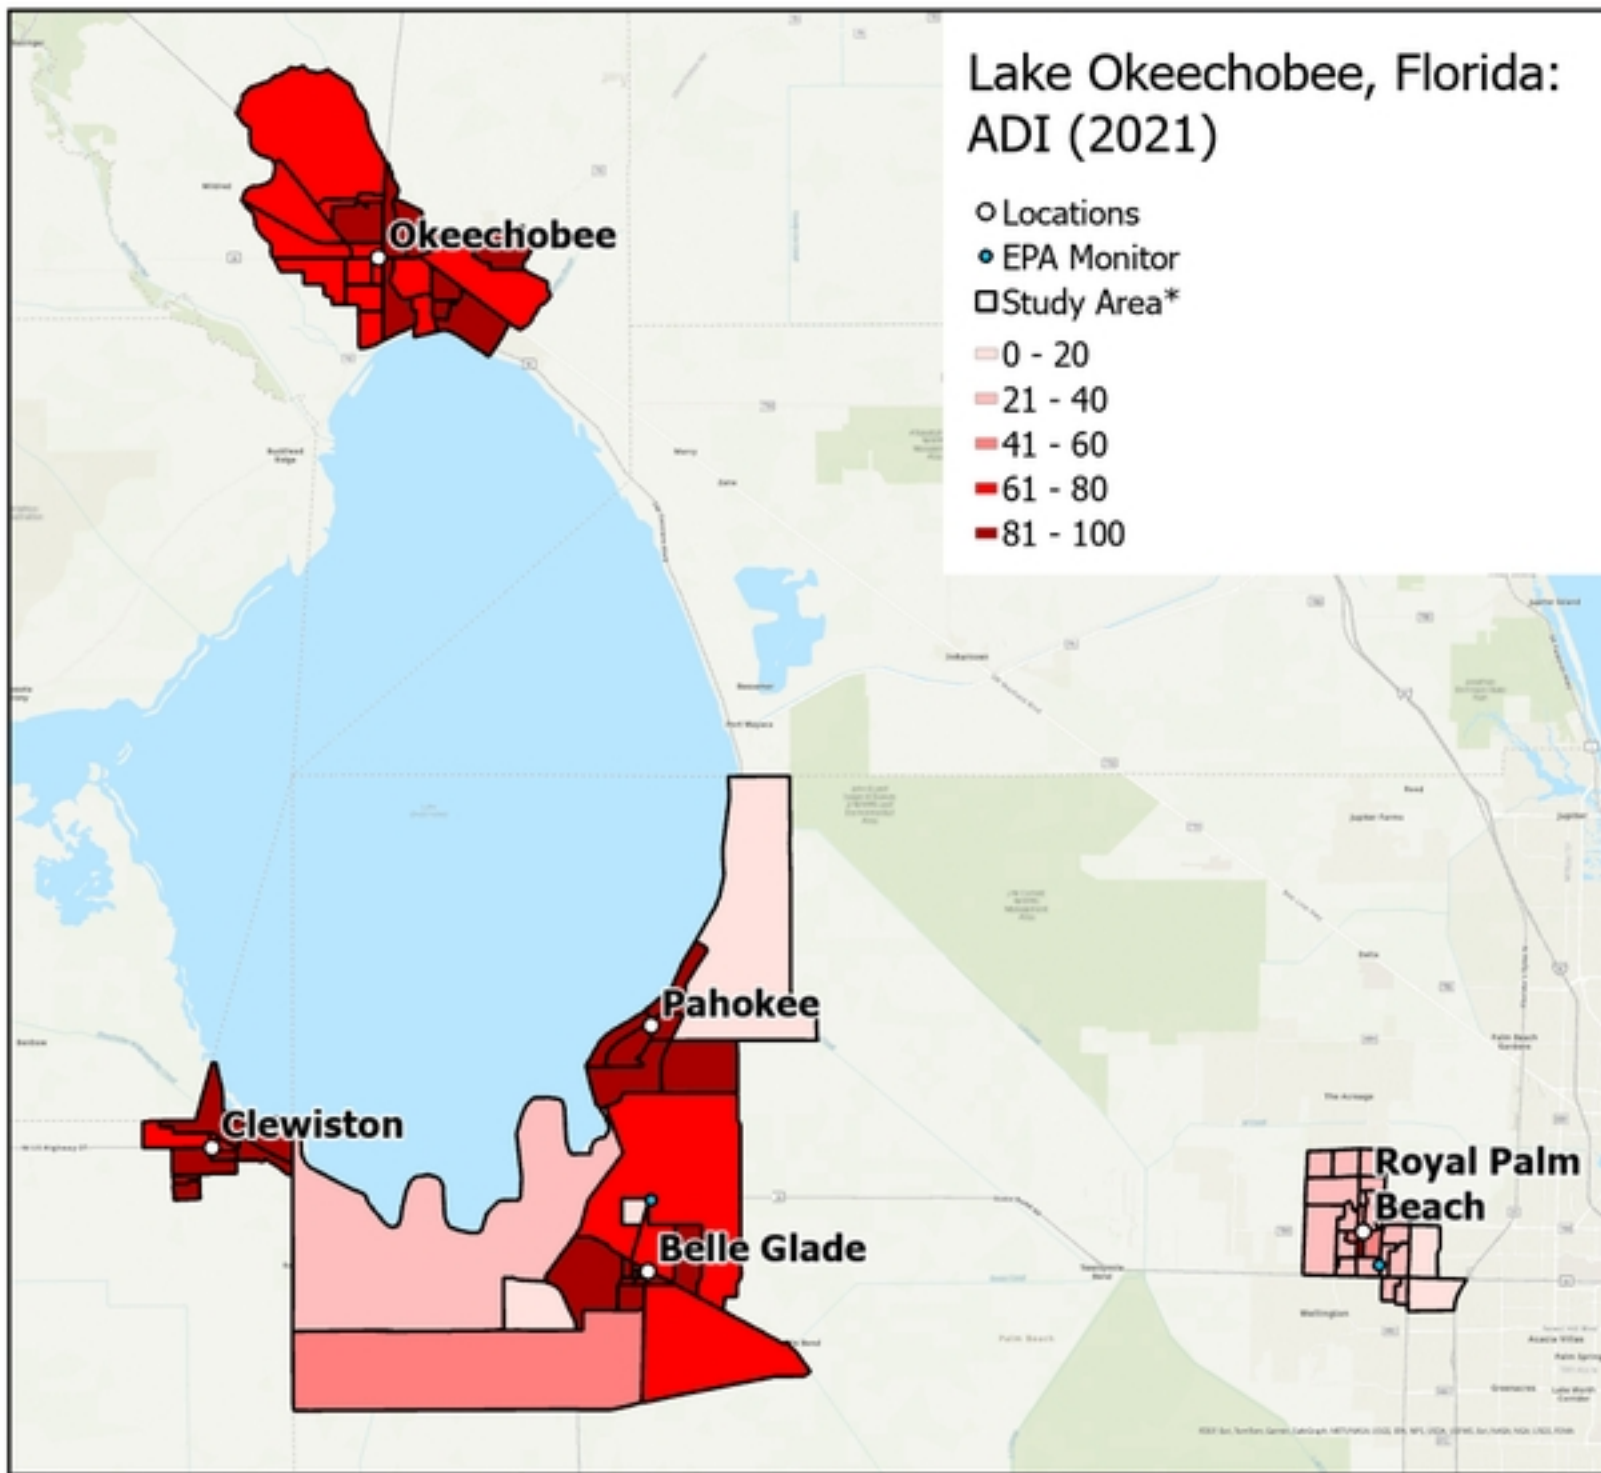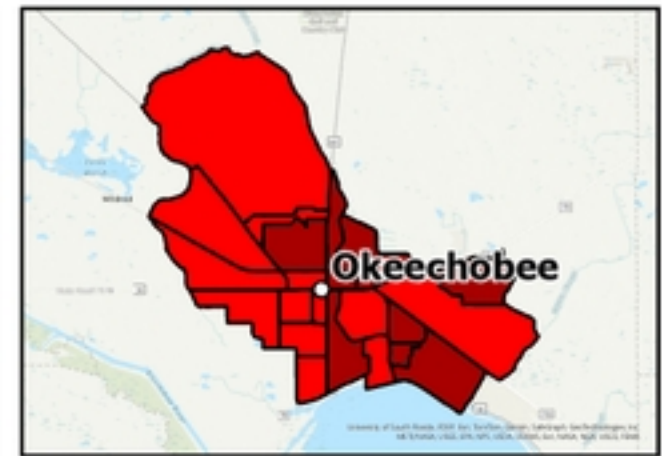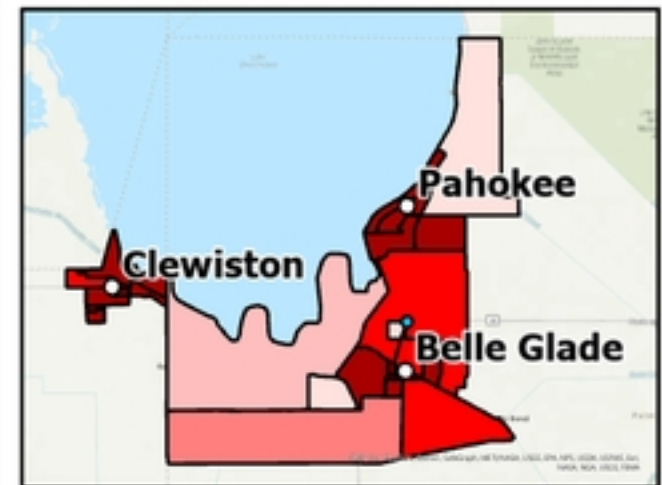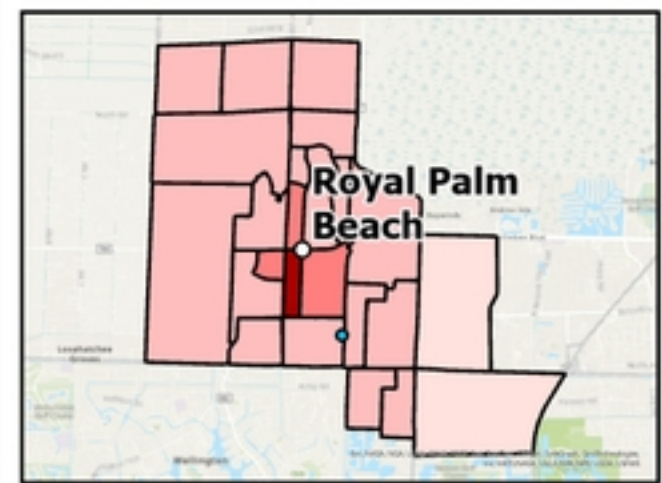

Figure 4
